## RESEARCH ARTICLE

# Development and validation of multiplex one-step qPCR/RT-qPCR assays for simultaneous detection of SARS-CoV-2 and pathogens associated with feline respiratory disease complex

Côme J. Thieulent<sup>1,2</sup>, Mariano Carossino<sup>1,2</sup>, Laura Peak<sup>1</sup>, Wendy Wolfson<sup>3</sup>, Udeni B. R. Balasuriya<sup>1,2\*</sup>

**1** Louisiana Animal Disease Diagnostic Laboratory, School of Veterinary Medicine, Louisiana State University, Baton Rouge, Louisiana, United States of America, **2** Department of Pathobiological Sciences, School of Veterinary Medicine, Louisiana State University, Baton Rouge, Louisiana, United States of America, **3** Department of Veterinary Clinical Sciences, School of Veterinary Medicine, Louisiana State University, Baton Rouge, Louisiana, United States of America

\* [balasuriya1@lsu.edu](mailto:balasuriya1@lsu.edu)

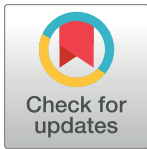

## OPEN ACCESS

**Citation:** Thieulent CJ, Carossino M, Peak L, Wolfson W, Balasuriya UBR (2024) Development and validation of multiplex one-step qPCR/RT-qPCR assays for simultaneous detection of SARS-CoV-2 and pathogens associated with feline respiratory disease complex. PLoS ONE 19(3): e0297796. <https://doi.org/10.1371/journal.pone.0297796>

**Editor:** Julian Ruiz-Saenz, Universidad Cooperativa de Colombia, COLOMBIA

**Received:** August 1, 2023

**Accepted:** January 12, 2024

**Published:** March 22, 2024

**Copyright:** © 2024 Thieulent et al. This is an open access article distributed under the terms of the [Creative Commons Attribution License](https://creativecommons.org/licenses/by/4.0/), which permits unrestricted use, distribution, and reproduction in any medium, provided the original author and source are credited.

**Data Availability Statement:** All relevant data are within the manuscript and its [Supporting information](#) file.

**Funding:** This study entitled "Development of multiplex real-time PCR assays for differentiating SARS-CoV-2 from other respiratory and enteric pathogens and enteric pathogens and an IgM/IgG ELISA for the serologic diagnosis of COVID-19 in dogs and cats" was funded to UBRB by the Vet-

## Abstract

Feline respiratory disease complex (FRDC) is caused by a wide range of viral and bacterial pathogens. Both Influenza A virus (IAV) and Severe Acute Respiratory Syndrome Coronavirus-2 (SARS-CoV-2) also induce respiratory diseases in cats. Two one-step multiplex qPCR/RT-qPCR assays were developed and validated: FRA\_1 (Feline respiratory assay 1) for the detection of four viral targets and FRA\_2 for the detection of three bacteria associated with FRDC. Both multiplex assays demonstrated high specificity, efficiency (93.51%–107.8%), linearity (> 0.998), analytical sensitivity ( $\leq 15$  genome copies/ $\mu$ l), repeatability (coefficient of variation [CV] < 5%), and reproducibility (CV < 6%). Among the 63 clinical specimens collected from FRDC-suspected cats, 92.1% were positive for at least one pathogen and co-infection was detected in 57.1% of samples. *Mycoplasma felis* (61.9%) was the most found pathogen, followed by feline herpesvirus-1 (30.2%), *Chlamydia felis* (28.7%) and feline calicivirus (27.0%). SARS-CoV-2 was detected in two specimens. In summary, this new panel of qPCR/RT-qPCR assays constitutes a useful and reliable tool for the rapid detection of SARS-CoV-2 and viral and bacterial pathogens associated with FRDC in cats.

## Introduction

Feline respiratory disease complex (FRDC) is a contagious respiratory or ocular disease caused by one or multiple viral and bacterial pathogens. FRDC is a major cause of morbidity and mortality in cats, particularly in high density facilities, such as shelters [1]. While FRDC may occur in adult cats, kittens are prone to develop more severe clinical signs [2]. Common clinical manifestations include mucopurulent nasal discharge, sneezing, conjunctivitis and ocular

LIRN COVID-19 Capacity Grant number 1U18FD007514 and supported by the Food and Drug Administration (FDA) of the U.S. Department of Health and Human Services (HHS) as part of a financial assistance award totaling \$100,000 with 100 percent funding by FDA/HHS. The contents are those of the author(s) and do not necessarily represent the official views of, nor an endorsement, by FDA/HHS, or the U.S. Government. Reference to any commercial materials, equipment, or process does not in any way constitute approval, endorsement, or recommendation by the Food and Drug Administration. CJT is partially supported through an NIH-USDA NIFA R01 Research Grant Program Dual Purpose with Dual Benefit: Research in Biomedicine and Agriculture Using Agriculturally Important Domestic Animal Species grant number 2019-67016-29102 (award number AWD-47990-1) from the USDA National Institute of Food and Agriculture to UBRB. Additionally, self-generated funds from UBRB and MC (PG008671) partially supported this study. The funders had no role in study design, data collection and analysis, decision to publish, or preparation of the manuscript.

**Competing interests:** The authors have declared that no competing interests exist.

discharge, coughing, fever, lethargy and inappetence of varying severity [3]. FRDC is the result of a complex multifactorial interaction between respiratory pathogens, stress, and individual animal susceptibility [2–4]. A wide array of viruses and bacteria are reported to induce FRDC in cats. The two most prevalent viruses responsible for FRDC are feline herpesvirus-1 (FHV-1; *Varicellovirus felidalpha1*, the causative agent of feline viral rhinotracheitis [FVR]) and *feline calicivirus* (FCV). The bacteria *Bordetella bronchiseptica*, *Chlamydia felis* and *Mycoplasma felis* are also frequently detected in cats with FRDC [3–11]. Co-infections are also common [3, 12, 13].

In the last two decades, Influenza A viruses (IAV: *Alphainfluenzavirus influenzae*) and *Severe acute respiratory syndrome-related coronavirus 2* (SARS-CoV-2) have been identified as emerging infections in cats [14]. Recent outbreaks of IAV infection have been reported [15, 16], and five subtypes of IAV were identified as the cause of acute respiratory illness including H5N1 [17–22], H1N1 [23–27], H5N6 [28–30], H7N2 [31, 32] and H3N2 [33, 34]. Depending on the IAV subtype, clinical signs in cats may be subclinical, or develop mild to severe and occasionally lethal respiratory disease [16, 20]. IAV seems to be transmitted to cats by birds, humans, and dogs [16, 33–36]. Furthermore, during COVID-19 pandemic dogs, cats and many other animal species were infected with SARS-CoV-2 [37–39]. Cats are susceptible to SARS-CoV-2 following both experimental and natural infection, although natural cases have been only sporadically reported [39–49]. Large wild felids including lions, tigers and pumas are also susceptible to natural infection [50–53]. SARS-CoV-2-infected cats may remain asymptomatic or display signs of respiratory disease clinically indistinguishable from other respiratory pathogens. [14, 40, 43, 44, 54, 55]. Based on the public health importance of SARS-CoV-2 and IAV (i.e., zoonotic potential), rapid laboratory diagnosis to differentiate these two infections from other common viral and bacterial agents is critical in controlling outbreaks and implementing appropriate public health measures.

Multiplex qPCR and RT-qPCR assays are commonly used in veterinary diagnostic settings [56–62]. Multiplexing has several advantages including reduction of cost, reduction in the amount of clinical sample needed, reduction of set-up and analysis time, and finally improved precision by minimizing pipetting errors. In this study, we developed and evaluated the analytical performance of a panel of two multiplex one-step qPCR/RT-qPCR assays for simultaneous detection and differentiation of viruses (Feline Respiratory Assay\_1: FRA\_1) and bacteria (FRA\_2) associated with FRDC in cats. This new panel was then used to test clinical specimens collected from FRDC-suspected felines in Louisiana, USA, between 2020 to 2022. Overall, this newly developed highly sensitive panel of multiplex qPCR/RT-qPCR assays can simultaneously detect all FRDC associated pathogens, as well as IAV and SARS-CoV-2 in feline clinical specimens with high analytical sensitivity and specificity.

## Materials and methods

### Viruses and bacteria

The panel of reference pathogens (viruses and bacteria) used for evaluating specificity (inclusivity/exclusivity) of each qPCR and RT-qPCR assay in singleplex and in multiplex format is presented in Table 1. RNA derived from Canine Influenza A (CIV) H3N2 VSL-1355 and CIV H3N8 A/Ca/FL/15592/04 were kindly provided by Dr. Diego Diel and Dr. Edward Dubovi (Department of Population Medicine and Diagnostic Sciences, Cornell University College of Veterinary Medicine, Ithaca, NY), respectively. All other prototype strains were obtained from the American Type Culture Collection (ATCC®; Manassas, VA), or BEI Resources (Manassas, VA).

**Table 1. Panel of viruses and bacteria associated with feline respiratory disorders, related pathogens and SARS-CoV-2 variants used to assess the specificity of each qPCR/RT-qPCR assay.**

| Pathogens                                  | Reference strain    | Source                          |
|--------------------------------------------|---------------------|---------------------------------|
| Feline Calicivirus (FCV)                   | VR-782 <sup>m</sup> | ATCC <sup>®</sup>               |
| SARS-CoV-2 USA-WA1/2020                    | NR-52281            | BEI Resources                   |
| SARS-CoV-2 Alpha (B.1.1.7)                 | NR-54020            | BEI Resources                   |
| SARS-CoV-2 Beta (B.1.351)                  | NR-55282            | BEI Resources                   |
| SARS-CoV-2 Delta (B.1.617.2)               | NR-55671            | BEI Resources                   |
| SARS-CoV-2 Omicron (B.1.1.529)             | NR-56461            | BEI Resources                   |
| Feline Herpesvirus 1 (FHV-1)               | VR-814 <sup>m</sup> | ATCC <sup>®</sup>               |
| Canine Influenza A (CIV) H3N2              | VLS-1355            | Cornell University <sup>a</sup> |
| CIV H3N8                                   | A/Ca/FL/15592/04    | Cornell University <sup>b</sup> |
| <i>Bordetella bronchiseptica</i> E014      | NR-44164            | BEI Resources                   |
| <i>Chlamydia felis</i> Everett et al.      | VR-120 <sup>m</sup> | ATCC <sup>®</sup>               |
| <i>Mycoplasma felis</i> Cole et al.        | 23391 <sup>m</sup>  | ATCC <sup>®</sup>               |
| <i>Mycoplasma cynos</i> Rosendal           | 27544 <sup>m</sup>  | ATCC <sup>®</sup>               |
| <i>Mycoplasma canis</i>                    | NR-3865             | BEI Resources                   |
| Feline Coronavirus (FCoV)                  | L1911562            | LADDL <sup>c</sup>              |
| Feline Infectious Peritonitis Virus (FIPV) | NR-43287            | BEI Resources                   |
| Feline Panleukopenia Virus (FPIV)          | VR-648 <sup>m</sup> | ATCC <sup>®</sup>               |

<sup>a</sup>Kindly provided by Dr. Diego Diel

<sup>b</sup>Kindly provided by Dr. Edward Dubovi

<sup>c</sup>LADDL: Louisiana Animal Disease Diagnostic Laboratory, School of Veterinary Medicine, Louisiana State University, Louisiana, United States of America

<https://doi.org/10.1371/journal.pone.0297796.t001>

## Clinical specimens

A total of 63 clinical specimens from 39 FRDC-suspected felines that were submitted for routine diagnostic testing to the Louisiana Animal Disease Diagnostic Laboratory (LADDL) between 2020 and 2022 were included in this study (S1 Table). The specimens were submitted by practicing veterinarians or the attending veterinarian from the LSU School of Veterinary Medicine Shelter Medicine Program. The cats submitted through the Shelter Medicine Program came from four shelters (Shelter 1 to 4) located in and around Baton Rouge, LA, in 2022. Nasal and pharyngeal specimens were collected using sterile oropharyngeal/nasal swabs (VMRD, Pullman, WA) and resuspended in either 2 ml of BHI Broth (Hardy Diagnostics, Santa Maria, CA) or 2 ml of PrimeStore<sup>®</sup> molecular transport medium (VMRD) and stored at 4°C until used.

## Nucleic acid extraction

Nasal swab samples were vortexed, spun down and total nucleic acid were extracted using the taco<sup>™</sup> mini nucleic acid automatic extraction system (GeneReach, Taichung, Taiwan) following manufacturer's recommendations. One-hundred microliters of nasal swab suspensions were extracted and eluted in the same volume of elution buffer. The extracted nucleic acid samples were stored at -80°C until used.

## Primers probes design

Specific forward and reverse primers and probes targeting the glycoprotein B (gB) of FHV-1 and open reading frame (ORF) 1 of FCV were designed using IDT's PrimerQuest tool

(<https://www.idtdna.com/Primerquest/home/Index>) from sequences available on the GenBank nucleotide database (<https://www.ncbi.nlm.nih.gov/nucleotide/>) (Table 2). The primers and probe sequence specificity were further validated *in silico* using the NCBI Basic Local Alignment Search Tool (BLAST; [https://blast.ncbi.nlm.nih.gov/Blast.cgi?PROGRAM=blastn&PAGE\\_TYPE=BlastSearch&LINK\\_LOC=blasthome](https://blast.ncbi.nlm.nih.gov/Blast.cgi?PROGRAM=blastn&PAGE_TYPE=BlastSearch&LINK_LOC=blasthome)). Self-annealing sites, hairpin loop formation and 3' complementarity were verified using IDT's OligoAnalyzer tool (<https://www.idtdna.com/calc/analyzer>). Influenza A virus [63] primers and probe targeting the matrix (M) gene were used as previously published [63, 64] with addition of degeneracies in the primers sequences in order to match that of IAV sequences from cats available on the Influenza Research Database (<https://www.fludb.org>) (Table 2). Sequences of primers and probes for

**Table 2. Primers and probe sequences used for the detection of FRDC-associated pathogens and SARS-CoV-2.**

| Target (gene)                                                                  | Oligonucleotide ID    | Primers and probe sequences (5'-3')        | Nucleotide position | Product size (bp) | GenBank accession # | Reference                   |
|--------------------------------------------------------------------------------|-----------------------|--------------------------------------------|---------------------|-------------------|---------------------|-----------------------------|
| SARS-CoV-2 (Nucleocapsid [ORF9a])                                              | SARS-CoV-2_N1-F       | GACCCCAAAATCAGCGAAAT                       | 28,287–28,306       | 72                | MN985325.1          | [63]                        |
|                                                                                | SARS-CoV-2_N1-R       | TCTGGTTACTGCCAGTTGAATCTG                   | 28,358–28,335       |                   |                     |                             |
|                                                                                | SARS-CoV-2_N1-P       | FAM-ACCCCGCATTACGTTTGGTGGACC-QSY           | 28,309–28,332       |                   |                     |                             |
| Influenza A virus (Matrix protein)                                             | IAV_M-F               | AGATGAGYCTTCTAACCAGGTCG                    | 24–47               | 101               | MF978391.1          | [61, 62] with modifications |
|                                                                                | IAV_M-R1 <sup>a</sup> | TGCAAAGACATCTTCAAGTYTCTG                   | 124–101             |                   |                     |                             |
|                                                                                | IAV_M-R2 <sup>a</sup> | TGCAAAGACACTTTCCAGTCTCTG                   | 124–101             |                   |                     |                             |
|                                                                                | IAV_M-P               | VIC-TCAGGCCCCCTCAAAGCCGA-QSY               | 74–93               |                   |                     |                             |
| Feline calicivirus (ORF-1)                                                     | FCV_ORF1-F            | CCGCCAATCAACATGTGGTA                       | 2,427–2,446         | 114               | L40021.1            | This article                |
|                                                                                | FCV_ORF1-R            | GCACATCATATGCGGCTCTG                       | 2,540–2,521         |                   |                     |                             |
|                                                                                | FCV_ORF1-P            | ABY-TGATTTGGCCTGGGCTCTTCG-QSY              | 2,464–2,484         |                   |                     |                             |
| Feline herpesvirus 1 (Glycoprotein B [UL27])                                   | FHV-1_gB-F            | GTTAATCCCAGCATCCGTTAC                      | 77,404–77,425       | 101               | MH070348.1          | This article                |
|                                                                                | FHV-1_gB-R            | CAGGGACACAGTGGCTATTT                       | 77,504–77,485       |                   |                     |                             |
|                                                                                | FHV-1_gB-P            | Cy5-CTACTCGGT/TAO/ATTGCAGCGACTGGC-3IAbRQSp | 77,459–44,436       |                   |                     |                             |
| <i>Bordetella bronchiseptica</i> (Intergenomic region between flaA and flIA B) | Fla2-F                | AGGCTCCCAAGAGAGAAAGGCTT                    | 1,140,858–1,140,880 | 118               | CP019934.1          | [64]                        |
|                                                                                | Fla12-R               | AAACCTGCCGTAATCCAGGC                       | 1,140,975–1,140,956 |                   |                     |                             |
|                                                                                | Fla-P                 | FAM-ACCGGGCAGCTAGGCCGC-QSY                 | 1,140,887–1,140,904 |                   |                     |                             |
| <i>Mycoplasma felis</i> (tuf)                                                  | Mfelis_tuf-F          | TAAATTAGCTCTTGATGGTGTTCCT                  | 469–493             | 100               | FJ896389.1          | [65]                        |
|                                                                                | Mfelis_tuf-R          | TTCAAAGTCTTTTCTGGAGTTTCA                   | 568–544             |                   |                     |                             |
|                                                                                | Mfelis_tuf-P          | VIC-TGAGAAGAAAAGTTATGGAATTAATGGATGCA-QSY   | 497–529             |                   |                     |                             |
| <i>Chlamydia felis</i> (ompA)                                                  | Cfelis_ompA-F         | TCGGATTGATTGGTCTTGCA                       | 449–468             | 78                | AY184290.1          | [66]                        |
|                                                                                | Cfelis_ompA-R         | GCTCTACAATGCCTTGAGAAATTTT                  | 526–502             |                   |                     |                             |
|                                                                                | Cfelis_ompA-P         | ABY-ACTGATTTCCCAATCAGCGTCCAA-QSY           | 472–496             |                   |                     |                             |

<sup>a</sup>IAV\_M-R1 and IAV\_M-R2 were used at equimolar amount (200 nM).

3IAbRQSp: 3' Iowa Black<sup>®</sup> RQ; ABY, ABY<sup>™</sup> dye; Cy5: Cyanine-5 dye; F: forward primer; FAM, 6-carboxyfluorescein dye; P: probe; QSY, QSY<sup>™</sup> quencher; R: reverse primer; TAO: TAO<sup>™</sup> quencher; VIC, VIC<sup>™</sup> dye.

<https://doi.org/10.1371/journal.pone.0297796.t002>

SARS-CoV-2 (US CDC SARS-CoV-2 N1 assay; Lu et al., 2020), *Bordetella bronchiseptica* [66], *Mycoplasma felis* [67] and *Chlamydia felis* [68] were used as previously published (Table 2).

### Multiplex TaqMan<sup>®</sup> quantitative PCR (qPCR) and reverse transcription PCR (RT-qPCR) assays for feline respiratory pathogens

A 4-plex RT-qPCR assay and a 3-plex qPCR assay were developed and designated as FRA\_1 (targeting SARS-CoV-2, IAV, FCV and FHV-1) and FRA\_2 (targeting *B. bronchiseptica*, *M. felis* and *C. felis*). Both assays were performed in a total volume of 25  $\mu$ l containing 12.5  $\mu$ l of 2X QuantiTect<sup>™</sup> Multiplex RT-PCR Master Mix, 0.25  $\mu$ l of QuantiTect<sup>™</sup> RT Mix (QIAGEN, Hilden, Germany), 1.25  $\mu$ l of primers (200 nM) and fluorogenic probes (200 nM) mix, 6  $\mu$ l of RNase free water and 5  $\mu$ l of template DNA/RNA. All reactions were run on a 7500 Fast Real-Time PCR System (Applied Biosystems, Waltham, MA) with the following thermal profile: a reverse transcription step (20 min at 50°C) following by an initial activation step (15 min at 95°C) and 40 cycles of denaturation & annealing/extension (45 sec at 94°C & 75 sec at 60°C). The complete step-by-step protocol has been deposited on the protocols.io platform (<https://dx.doi.org/10.17504/protocols.io.ewov1q4z2gr2/v1>).

### Synthesis of *in vitro* transcribed RNA and DNA

Specific plasmid DNA and *in vitro* transcribed (IVT) RNA were synthesized in order to determine the analytical sensitivity of each multiplex qPCR/RT-qPCR assay as previously described [56], with minor modifications. Two inserts, containing the target regions of each assay flanked by *PstI* and *HindIII* restriction sites, were chemically synthesized and cloned into the pGEM<sup>®</sup>-3Z vector (Promega, Madison, WI) downstream the T7 promoter (pGEM--3Z\_FCV\_FHV1\_IAV\_SCoV2 and pGEM-3Z\_Bbron\_Mcynos\_Mfelis\_Cfelis) by GeneArt Gene Synthesis (Thermo Fisher Scientific, Waltham, MA). Transformed *Escherichia coli* DH10 $\beta$  cells were incubated overnight at 37°C with agitation (270 rpm). Plasmid DNA was extracted using the QIAprep Spin Miniprep kit (QIAGEN). Both plasmids were linearized using *HindIII* restriction enzyme and plasmid DNA concentration was measured using Qubit dsDNA BR Assay Kit (Thermo Fisher Scientific). pGEM-3Z\_FCV\_FHV1\_IAV\_SCoV2 plasmid was subjected to *in vitro* transcription using the Megascript<sup>®</sup> T7 Transcription Kit (Thermo Fisher Scientific) following manufacturer's recommendations. Subsequently, DNase treatment was performed with TURBO<sup>™</sup> DNase (Thermo Fisher Scientific) for 15 min at 37°C. The IVT RNA products were purified using MEGAclear<sup>™</sup> Transcription Clean-Up Kit (Thermo Fisher Scientific) and quantified using Qubit RNA BR Assay Kit (Thermo Fisher Scientific). The number of plasmid DNA and IVT RNA copies/ $\mu$ l were calculated according to the following formula [56, 60–62, 69–72]:

$$\text{Number of plasmid DNA and IVT RNA molecules}/\mu\text{l} = \frac{\text{Avogadro's number } (6.022 \times 10^{23}) \times \text{Plasmid DNA/IVTRNA concentration } \left(\frac{\text{g}}{\mu\text{l}}\right)}{\text{Plasmid DNA/IVT RNA molecular weight } \left(\frac{\text{g}}{\text{mol}}\right)}$$

Plasmid DNA and IVT RNA molecular weight were calculated using Molbiotools website (<https://molbiotools.com/dnacalculator.php>) and concentrations were adjusted to 10<sup>7</sup> copies/ $\mu$ l in nuclease-free water containing 40 ng/ $\mu$ l of yeast tRNA (Thermo Fisher Scientific) and stored at -80°C until use. Ten-fold serial dilutions of plasmid DNA/IVT RNA was directly used for determining the analytical sensitivity of the qPCR assay targeting the DNA viruses and bacteria.



## Analytical parameter determination and statistical analysis

Analytical parameters were determined as previously described [56] with minor modifications. Standard curves were generated using a ten-fold dilution series of plasmid DNA or IVT RNA ( $10^7$  to  $10^2$  copies/ $\mu\text{l}$ ) in triplicate. Coefficients of determination ( $R^2$ ) were used to assess curve fitness. Amplification efficiency [E (%)] was calculated after regression analysis using the following formula:  $E = [10^{-1/\text{slope}} - 1] \times 100$ . Limit of detection with 95% confidence ( $\text{LOD}_{95\%}$ ) of each assay was determined by statistical probit analysis (non-linear regression model) using SPSS 14.0 software (SPSS Inc., Chicago, IL) from twelve replicates per dilution ranging from  $10^3$  to  $10^0$  copies/ $\mu\text{l}$ . Cycle threshold (Ct) cut-off values were determined using the following formula: Ct cut-off = Average replicate values of the endpoint dilution + ( $3 \times$  standard deviation (SD)) [73]. Intra-run and inter-run imprecision were determined by performing 12 replicates on the same run or three replicates on two independent runs of plasmid DNA/IVT RNA containing  $10^5$  to and  $10^3$  copies/ $\mu\text{l}$ , respectively. The coefficient of variation (%CV) was calculated using the following formula:  $\%CV = 100 \times (\text{standard deviation of replicates} [\log_{10} \text{copies}/\mu\text{l}] \div \text{average of replicates} [\log_{10} \text{copies}/\mu\text{l}])$ . All graphs were created using GraphPad Prism v9.3.1 statistical analysis software (GraphPad, San Diego, CA).

## Results

### Analytical specificity of singleplex and multiplex qPCR/RT-qPCR assays for the detection of feline respiratory pathogens

The analytical specificity (inclusivity/exclusivity) of all singleplex and multiplex qPCR/RT-qPCR assays were first evaluated using a panel of reference viruses and bacteria associated with respiratory, systemic, and enteric diseases in cats, as well as different SARS-CoV-2 variants of concern (VOC). All assays used and developed in this study showed exclusive specificity for their respective targets and did not cross-react between each other under multiplex conditions (S1 Fig). The specificity of the *M. felis* (tuf) assay was confirmed by absence of amplification of *M. canis* and *M. cynos* DNA extracts. Additionally, none of the assays amplified nucleic acids extracted from other feline viruses, including feline coronavirus (FCoV), feline infectious peritonitis virus (FIPV), and feline panleukopenia virus (FPLV).

### Analytical sensitivity of singleplex and multiplex qPCR/RT-qPCR assays for the detection of feline respiratory pathogens

The analytical sensitivity of all assays in singleplex and in multiplex format were determined using ten-fold serial dilutions ( $10^7$  copies/ $\mu\text{l}$  to  $10^2$  copies/ $\mu\text{l}$ ) of plasmid DNA/IVT RNA containing the target sequences. Linear standard curves were generated for each assay in singleplex and multiplex with a coefficient of linear regression ( $R^2$ )  $\geq 0.998$  (Fig 1A, Table 3, S2 and S3 Figs). Amplification efficiency for each singleplex assay was between 97.31% and 108.49%. When tested in multiplex, a similar amplification efficiency was observed with values comprised between 93.51% and 107.81% (Table 3). The lower limit of detection ( $\text{LOD}_{95\%}$ ) varied between 6 to 15 RNA/DNA copies/ $\mu\text{l}$  for each singleplex and multiplex assays (Fig 1B). A similar detection rate limit (100%) was calculated for each assay when used in both singleplex and multiplex conditions (10 to 100 copies/ $\mu\text{l}$ ). Altogether, these results demonstrate the high analytical sensitivity of our panel of qPCR/RT-qPCR assays for the detection of feline respiratory pathogens, without loss of sensitivity when used in multiplex conditions.

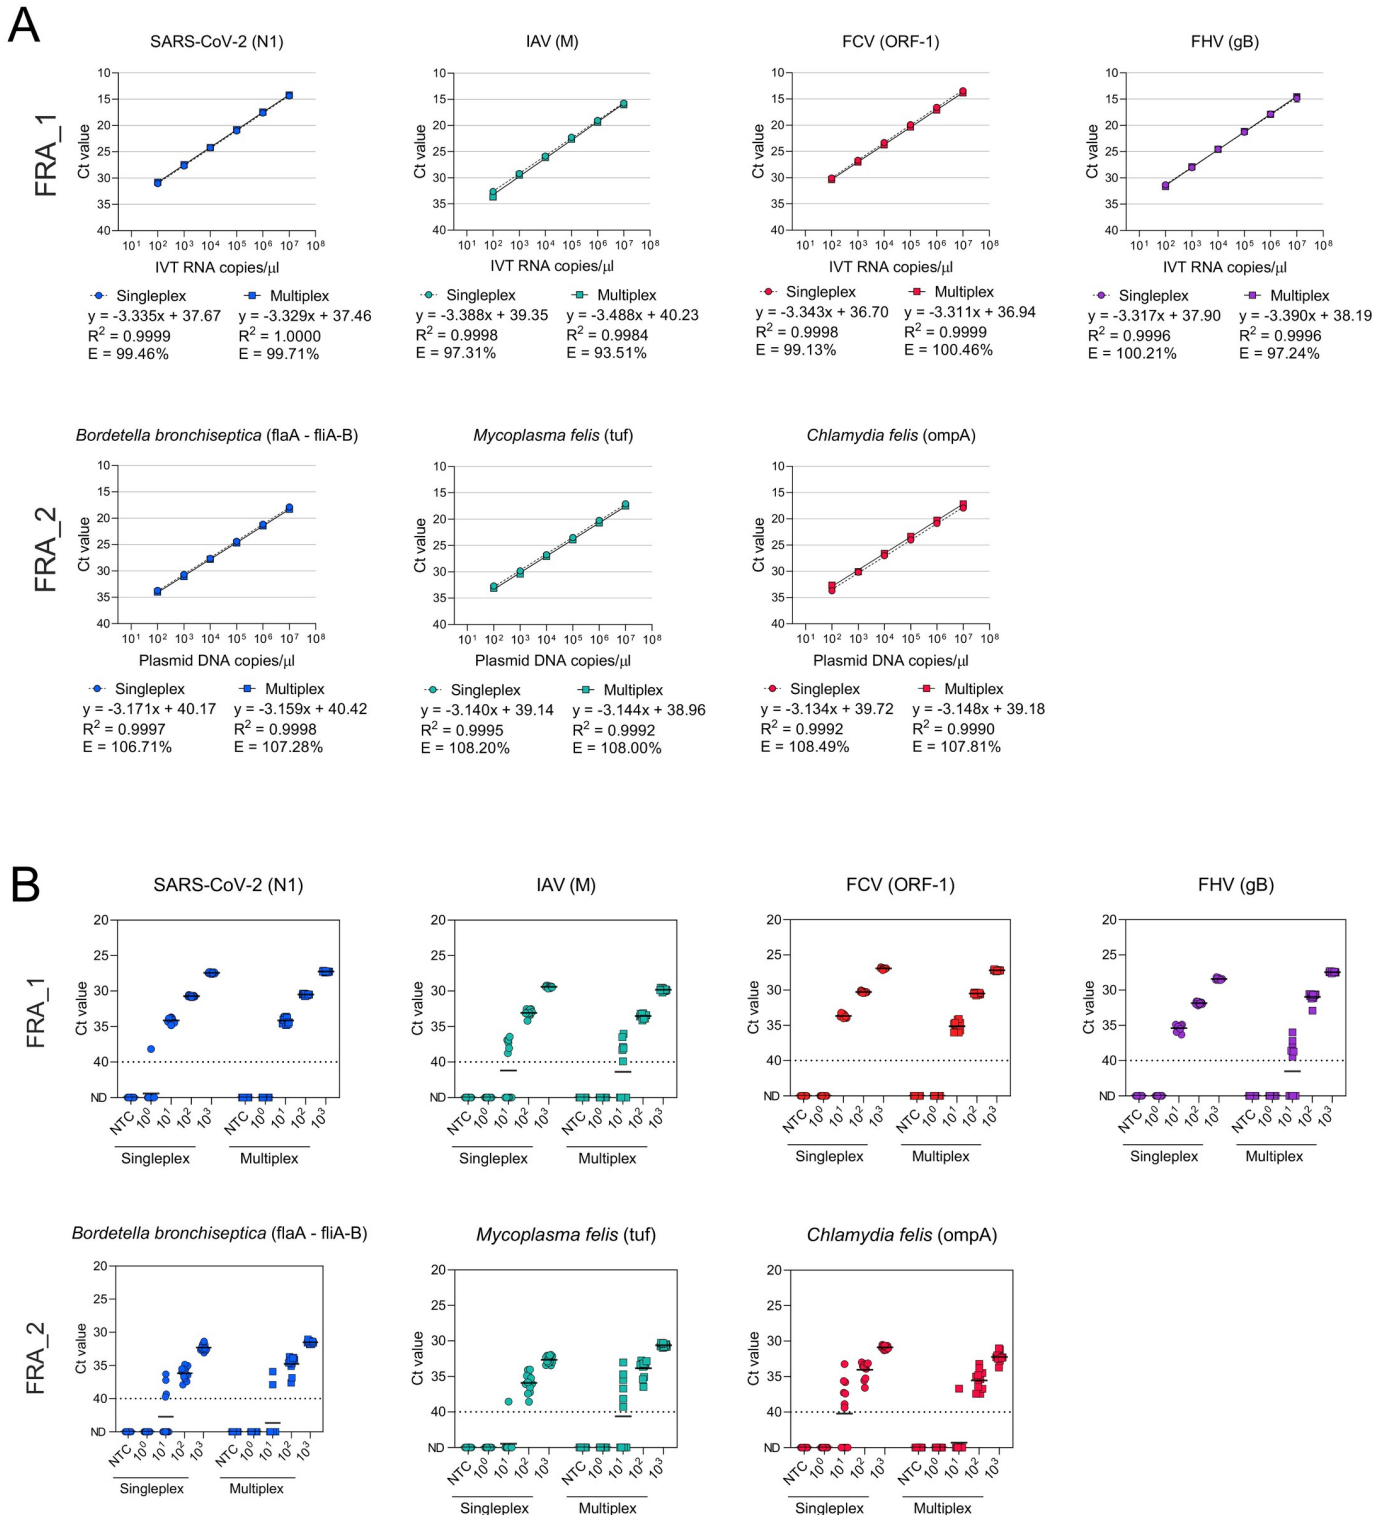

**Fig 1. Analytical parameters of singleplex and multiplex qPCR/RT-qPCR assays for the detection of FRDC-associated pathogens and SARS-CoV-2.** A) Comparison of analytical sensitivity of each singleplex and multiplex qPCR/RT-qPCR assays for the detection of pathogens associated with FRDC. B) Analytical sensitivity determination of singleplex and multiplex qPCR/RT-qPCR assays. Each assay was performed using 12 replicates ranging from 10<sup>3</sup> to 10<sup>0</sup> copies/μl of IVT DNA/RNA. Each circle and square indicate the Ct value of one replicate obtained by singleplex and multiplex amplification, respectively. Short solid lines indicate the median Ct value and dashed lines indicate the detection limit. Ct: Cycle threshold; IVT RNA: *in vitro* transcribed RNA; R<sup>2</sup>: linearity; E: Efficiency; ND: not detected; NTC: no template control.

<https://doi.org/10.1371/journal.pone.0297796.g001>

**Table 3. Analytical sensitivity of singleplex and multiplex qPCR/RT-qPCR assays for the detection of FRDC-associated pathogens and SARS-CoV-2.**

| Assay             | Target                                 | Parameter  | Slope  | Linearity (R <sup>2</sup> ) | Efficiency (%) | LOD <sub>95%</sub> (copies/μl) | Detection rate limit (copies/μl) | Ct cut-off |
|-------------------|----------------------------------------|------------|--------|-----------------------------|----------------|--------------------------------|----------------------------------|------------|
| FRA_1             | SARS-CoV-2 (N1 (ORF9a))                | Singleplex | -3.335 | 0.9999                      | 99.46          | 8                              | 10                               | 35         |
|                   |                                        | Multiplex  | -3.329 | 1.0000                      | 99.71          | 15                             | 100                              | 35         |
|                   | IAV (M)                                | Singleplex | -3.388 | 0.9998                      | 97.31          | 15                             | 100                              | 34         |
|                   |                                        | Multiplex  | -3.488 | 0.9984                      | 93.51          | 15                             | 100                              | 34         |
|                   | FCV (ORF-1)                            | Singleplex | -3.343 | 0.9998                      | 99.13          | 8                              | 10                               | 35         |
|                   |                                        | Multiplex  | -3.311 | 0.9999                      | 100.46         | 8                              | 10                               | 37         |
| FHV-1 (gB [UL27]) | Singleplex                             | -3.317     | 0.9996 | 100.21                      | 6              | 10                             | 37                               |            |
|                   | Multiplex                              | -3.390     | 0.9996 | 97.24                       | 8              | 10                             | 33                               |            |
| FRA_2             | <i>B. bronchiseptica</i> (flaA—fliA-B) | Singleplex | -3.171 | 0.9997                      | 106.71         | 9                              | 100                              | 39         |
|                   |                                        | Multiplex  | -3.159 | 0.9998                      | 107.28         | 11                             | 100                              | 38         |
|                   | <i>M. felis</i> (ompA)                 | Singleplex | -3.140 | 0.9995                      | 108.20         | 15                             | 100                              | 40         |
|                   |                                        | Multiplex  | -3.151 | 0.9994                      | 107.66         | 9                              | 100                              | 37         |
|                   | <i>C. felis</i> (tuf)                  | Singleplex | -3.134 | 0.9992                      | 108.49         | 15                             | 100                              | 40         |
|                   |                                        | Multiplex  | -3.148 | 0.9990                      | 107.81         | 7                              | 100                              | 37         |

FRA: Feline respiratory assay; R<sup>2</sup>: Linearity; LOD<sub>95%</sub>: Limit of detection 95%; Ct: Cycle threshold.

<https://doi.org/10.1371/journal.pone.0297796.t003>

### Repeatability and reproducibility of multiplex qPCR/RT-qPCR assays for detection of feline respiratory pathogens

The repeatability and reproducibility of both multiplex assays was measured by determining the intra-run and inter-run imprecision, respectively. A range of three concentrations; 10<sup>5</sup> copies/μl (high target concentration), 10<sup>4</sup> copies/μl (medium target concentration) and 10<sup>3</sup> copies/μl (low target concentration), of plasmid DNA/IVT RNA was used to determine the coefficient of variability (CV) of each assay. For all assays the intra-run imprecision was < 1.5% at high target concentration, < 4% at medium target concentration and < 5% at low target concentration (Table 4). Similarly, the inter-run imprecision was < 3% at high target concentration, < 2.5% at medium target concentration and < 6% at low target concentration. While the CV increases with lower target concentrations, these data indicate that all multiplex assays have a high repeatability and reproducibility at high to low concentrations.

**Table 4. Precision assessment of the feline respiratory assays 1 (FRA\_1) and FRA\_2.**

| Assay | Target                                 | Intra-run variability CV (%) <sup>#</sup> |                           |                           | Inter-run variability CV (%) <sup>#</sup> |                           |                           |
|-------|----------------------------------------|-------------------------------------------|---------------------------|---------------------------|-------------------------------------------|---------------------------|---------------------------|
|       |                                        | 10 <sup>5</sup> copies/μl                 | 10 <sup>4</sup> copies/μl | 10 <sup>3</sup> copies/μl | 10 <sup>5</sup> copies/μl                 | 10 <sup>4</sup> copies/μl | 10 <sup>3</sup> copies/μl |
| FRA_1 | SARS-CoV-2 (N)                         | 0.66                                      | 0.70                      | 1.28                      | 0.88                                      | 1.45                      | 2.55                      |
|       | IAV (M)                                | 0.71                                      | 0.91                      | 2.78                      | 1.42                                      | 1.15                      | 2.58                      |
|       | FCV (ORF-1)                            | 0.60                                      | 0.98                      | 1.17                      | 0.78                                      | 0.98                      | 2.27                      |
|       | FHV-1 (gB)                             | 0.55                                      | 0.50                      | 1.33                      | 1.07                                      | 2.12                      | 3.08                      |
| FRA_2 | <i>B. bronchiseptica</i> (flaA—fliA-B) | 0.85                                      | 2.48                      | 4.09                      | 0.59                                      | 1.25                      | 3.27                      |
|       | <i>M. felis</i> (tuf)                  | 1.27                                      | 3.53                      | 4.88                      | 2.86                                      | 2.09                      | 5.41                      |
|       | <i>C. felis</i> (ompA)                 | 1.00                                      | 2.782                     | 4.483                     | 0.67                                      | 2.05                      | 2.24                      |

<sup>#</sup>CV (%): Coefficient of variation = (standard deviation of replicates [log<sub>10</sub> copies/μl] ÷ Average of replicates [log<sub>10</sub> copies/μl]) × 100

<https://doi.org/10.1371/journal.pone.0297796.t004>



### Screening of clinical specimens collected from FRDC-suspected cats

The panel of multiplex assays was used to test 63 clinical samples collected from domestic cats and exotic felids that displayed respiratory disease between 2020 and 2022 in Louisiana, USA. Among the 63 samples, 58 (92.1%) were positive for at least one of the seven pathogens screened. *M. felis* (61.9%) was the most commonly identified agent, followed by FHV-1 (30.2%), *C. felis* (28.7%) and FCV (27.0%) (Fig 2 and Table 5). *B. bronchiseptica* and SARS-CoV-2 were detected in four (6.3%) and two (3.2%) samples, respectively. None of the samples were positive for IAV. Both SARS-CoV-2 positive samples were collected from two 6-year-old female African lions with cough in 2021 within the same zoo. Partial sequencing of the Spike protein gene (ORF 2) performed by the National Veterinary Services Laboratories, Ames, IA, indicated that both SARS-CoV-2 isolates were consistent with the Delta variant (clade

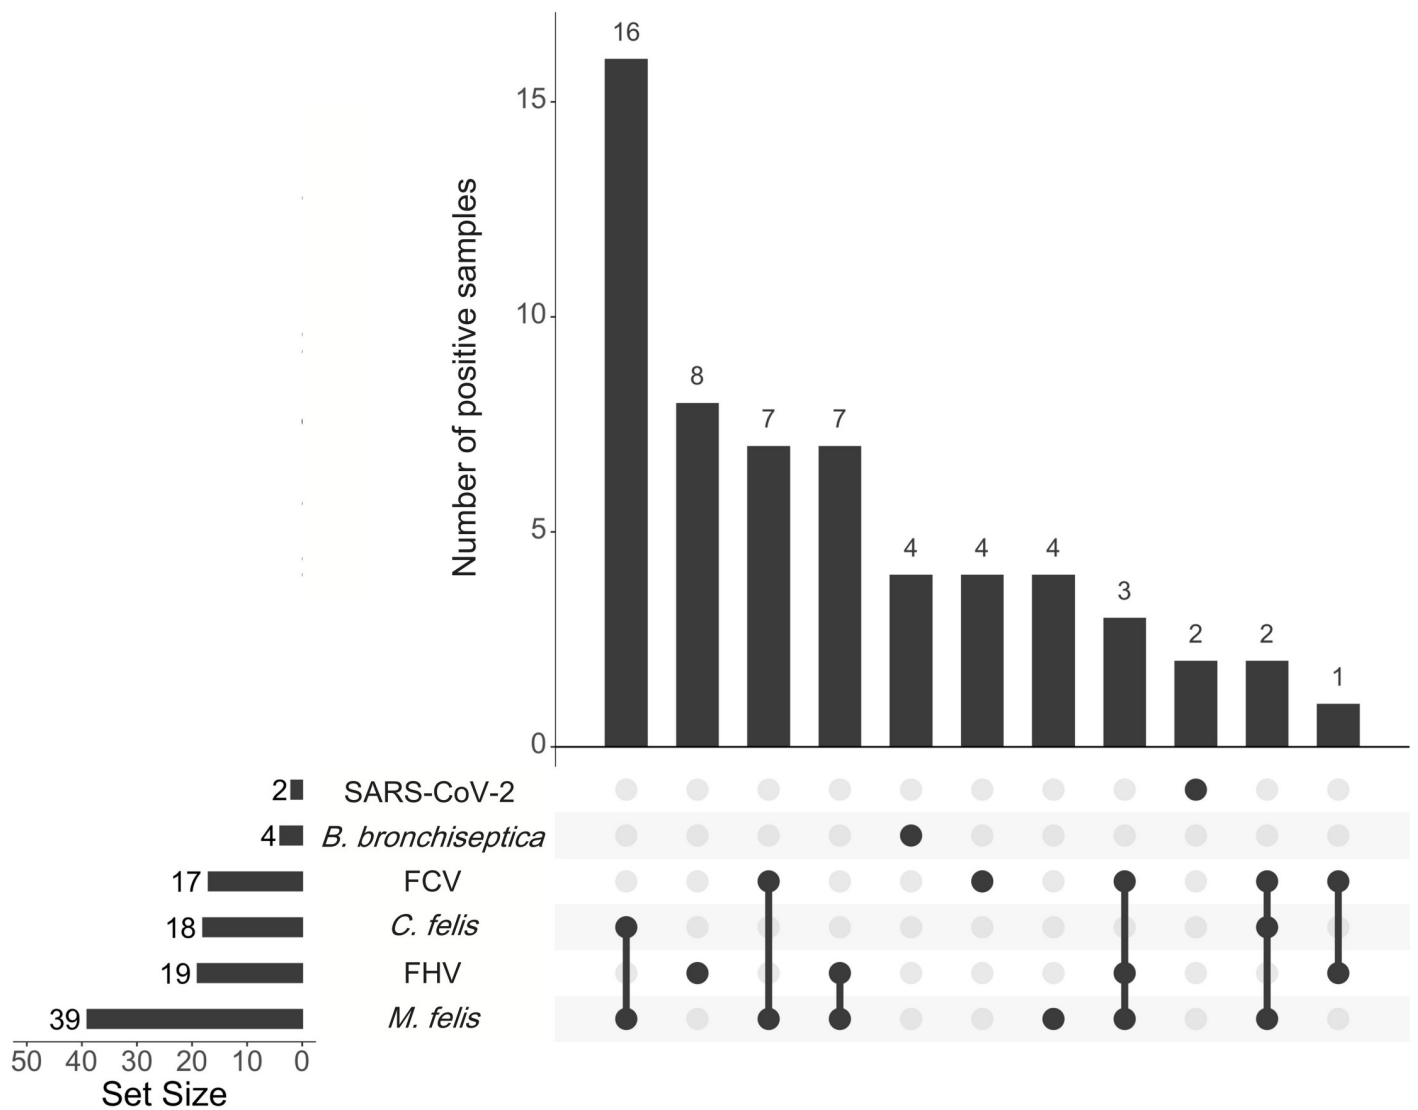

Fig 2. UpSet plot summarizing the number of feline respiratory pathogens and SARS-CoV-2 detected in felids using the newly developed multiplex qPCR/RT-qPCR panel. The number of samples with single agents detected or with multiple agents detected (co-infection) are shown as vertical bars. The bottom left horizontal bar graph labeled Set Size shows the total number of samples positives for each specific feline respiratory pathogen and SARS-CoV-2.

<https://doi.org/10.1371/journal.pone.0297796.g002>

**Table 5. Detection rate of FRDC-associated pathogens in the clinical specimens used to evaluate the FRA\_1 and FRA\_2 assays.**

| Pathogens                | No. of positives (n = 58/63)* | % positive (92.1%)* |
|--------------------------|-------------------------------|---------------------|
| SARS-CoV-2               | 2                             | 3.2                 |
| IAV                      | 0                             | 0                   |
| FCV                      | 17                            | 27.0                |
| FHV-1                    | 19                            | 30.2                |
| <i>B. bronchiseptica</i> | 4                             | 6.3                 |
| <i>M. felis</i>          | 39                            | 61.9                |
| <i>C. felis</i>          | 18                            | 28.7                |

\*Positive samples for at least one pathogen

<https://doi.org/10.1371/journal.pone.0297796.t005>

**Table 6. Detection rate of single agent infections and co-infections associated with FRDC in the clinical specimens evaluated with FRA\_1 and FRA\_2 assays.**

| Pathogens                                                     | No. of Positive samples | % of Positive samples |
|---------------------------------------------------------------|-------------------------|-----------------------|
| <b>Respiratory infections associated with one pathogen</b>    | <b>22/63*</b>           | <b>34.9</b>           |
| SARS-CoV-2                                                    | 2                       | 3.2                   |
| FCV                                                           | 4                       | 6.3                   |
| <i>B. bronchiseptica</i>                                      | 4                       | 6.3                   |
| <i>M. felis</i>                                               | 4                       | 6.3                   |
| FHV-1                                                         | 8                       | 12.7                  |
| <b>Respiratory infections associated with two pathogens</b>   | <b>31/63*</b>           | <b>49.2</b>           |
| FHV-1 + FCV                                                   | 1                       | 1.6                   |
| FHV-1 + <i>M. felis</i>                                       | 7                       | 11.1                  |
| FCV + <i>M. felis</i>                                         | 7                       | 11.1                  |
| <i>C. felis</i> + <i>M. felis</i>                             | 16                      | 25.4                  |
| <b>Respiratory infections associated with three pathogens</b> | <b>5/63*</b>            | <b>7.9</b>            |
| FCV + <i>C. felis</i> + <i>M. felis</i>                       | 2                       | 3.2                   |
| FHV-1 + FCV + <i>M. felis</i>                                 | 3                       | 4.8                   |

\*5/63 (7.9%) specimens were negative for the pathogens tested.

<https://doi.org/10.1371/journal.pone.0297796.t006>

B.1.617.2). The complete sequences were previously deposited in GISAID database under accession numbers EPI\_ISL\_9046672 and EPI\_ISL\_9046673.

Single infections and co-infections were observed in 22 (34.9%) and 36 (57.1%) samples, respectively (Fig 2 and Table 6), demonstrating that infections with more than one FRDC-associated pathogen can occur more often. Except for the co-infection of FHV-1 with FCV in one sample, all other co-infected samples consisted of a combination of *M. felis* with FHV, FCV or *C. felis* (Fig 2 and Table 6). Co-infection of *M. felis* with *C. felis* was also commonly observed in the clinical specimens tested (16/36; 44.5%).

## Discussion

The most common pathogens reported to induce feline respiratory disease include FCV, FHV-1, *B. bronchiseptica*, *M. felis* and *C. felis* [3, 8]. The emergence of new pathogens (e.g. IAV and SARS-CoV-2) and the continuous circulation of common etiological agents in the feline population has made feline FRDC more complex and challenging its clinical diagnosis

[14]. Additionally, co-infections by two or more viral and/or bacterial pathogens is commonly observed in cats suffering from FRDC, making the treatment challenging [74, 75]. The traditional methods for infectious agent identification, such as bacterial culture, viral isolation and conventional PCR are time consuming, have low sensitivity and are not suitable for easy identification of co-infections. Multiplex qPCR/RT-qPCR is a rapid and sensitive technique now commonly used in veterinary diagnostic laboratories [56–59]. However, there were no multiplex qPCR/RT-qPCR assays available for detection of infectious agents associated with FRDC. To overcome this, we developed a panel of two multiplex qPCR/RT-qPCR for the detection of the most prevalent feline respiratory pathogens as well as the detection of two emerging viruses of cats, IAV and SARS-CoV-2.

In this study two multiplex qPCR/RT-qPCR assays were developed, namely FRA\_1 and FRA\_2, for the detection of viruses (i.e., FCV, FHV-1, IAV and SARS-CoV-2) and bacteria (i.e., *B. bronchiseptica*, *M. felis* and *C. felis*), respectively. These multiplex assays were designed using a combination of well-established qPCR/RT-qPCR assays [63–68] and adding two new primers/probe combinations for the detection of FCV and FHV-1. These new primer/probe sets were developed targeting the highly conserved ORF1 and gB of FCV and FHV-1, respectively [76]. Both assays, as well as previously published assays showed high specificity for their targets alone and in combination, confirming the absence of non-specific amplification. Analytical sensitivity of each multiplex qPCR/RT-qPCR assays were evaluated in this study and compared to singleplex assays. The nearly perfect linearity ( $R^2 > 0.998$ ) and high amplification efficiency ( $> 93\%$ ) denotes the overall excellent analytical performance of each assay. In addition, no difference in analytical performance was observed between singleplex and multiplex formats of the assays. Detection of low genomic copy numbers is critical to assay's sensitivity. Here, with a  $LOD_{95\%} \leq 15$  copies/ $\mu$ L, a high analytical sensitivity was observed for all our primers and probe sets when multiplexed. The  $LOD_{95\%}$  determined here showed a three to four  $\log_{10}$  improvement compared to the recently published multiplex conventional PCR assays for the detection of FHV-1, FCV, IAV and *C. felis* ( $LOD$  were  $1 \times 10^4$  to  $1 \times 10^5$  copies/ $\mu$ L) [77]. Measuring both intra-run and inter-run assay variability is important to assess the assay's quality and reproducibility. Here, a low intra-run and inter-run assay variabilities were observed for all assays when run in multiplex. This indicated that the qPCR/RT-qPCR assays are robust and consistent, providing confidence in the results obtained in this study. Overall, excellent analytical parameters were determined for both FRA\_1 and FRA\_2 multiplex assays.

It is worth noting that a single nucleotide degeneracy was introduced to the forward and reverse primers of the IAV assay, respectively, in order to empirically guarantee annealing to IAV strains derived from cats ( $n = 37$ ) and retrieved from the Influenza Research Database. While it has been demonstrated that  $>4$  degenerate nucleotides can lead to amplification bias and a reduction of the sensitivity (10-fold) [78–80], the introduction of one degenerate nucleotide per primer in this case did not seemingly affected the sensitivity of this or other targets combined ( $LOD_{95\%}$  for IAV = 15 copies/ $\mu$ L in singleplex and multiplex conditions). The absence of IAV in any of the samples collected during the period of this study could be associated with the limited number of available samples during the study period as well as to the epidemiological occurrence of IAV in cats, which typically occur within distinct temporal and geographic locations. Hence, IAV infection in cats is relatively rare [16], but their impact in cat populations and potential public health impact [15, 16], makes its diagnosis highly relevant.

To our knowledge, this study is the first reporting on the development of a complete panel of multiplex qPCR/RT-qPCR for the detection of feline respiratory pathogens along with SARS-CoV-2. Our panel was then used to evaluate clinical specimens collected from FRDC-suspected cats in different shelters, veterinary practices, and a zoo in Baton Rouge and the

surrounding area between 2020 and 2022. As only a small number of samples were tested in this study, no conclusions can be made concerning the prevalence of the feline respiratory pathogens in this area. Nevertheless, a high rate of co-infections (57.1%) was detected in the samples collected here, supporting the need for simultaneous detection of multiple pathogens involved in FRDC. The most common infectious agent detected in this study was *M. felis* (61.9%), as consistently reported [12, 74, 81, 82]. A meta-analysis demonstrated that *M. felis* and FRDC were significantly associated [83], suggesting that *M. felis* may act as the initial pathogen that may predispose the cats to other viral and bacterial pathogens. However, the hypothesis that this bacterium may overgrow following damage as a consequence of FRDC needs to be considered, especially, because it was detected in almost all co-infected samples (35/36; 97.2%). However, further studies are still needed to determine the role of *M. felis* in feline FRDC. FCV, FHV-1 and *C. felis* were detected in approximately 30% of the tested samples, which is consistent with previous reports [8, 12, 74, 75, 81]. The detection of SARS-CoV-2 Delta VOC (B.1.617.2) in nasal swabs of two lions from the same premise by the CDC-developed RT-qPCR test [65] confirm that it can be multiplexed with other qPCR/RT-qPCR assays, as previously demonstrated [61, 62]. The use of SARS-CoV-2-positive nasal swabs from lions in this study was for the sole purpose of evaluating the performance of the panels developed. While domestic cats are susceptible to natural and experimental SARS-CoV-2 infections [39–49], SARS-CoV-2 has not, at least yet, established as a relevant pathogen in cats responsible for FRDC. However, screening for SARS-CoV-2 in cats with FRDC is relevant from a public health standpoint.

While the assays developed here demonstrated optimal analytical performance, one of the main limitations of this study is the limited number of available samples to perform thorough clinical performance evaluation. Thus, continued evaluation of clinical specimens to assess the assay's performance in the field is warranted. In conclusion, this study highlights the strength of our new qPCR/RT-qPCR panel for the detection of SARS-CoV-2, IAV and the most important FRDC-associated pathogens. Therefore, this panel is suitable for routine diagnostics and rapid identification of pathogens associated with feline respiratory disease outbreaks in catteries, shelters, and pet shops where they house a large number of cats.

## Supporting information

**S1 Fig. Assessment of the specificity of each qPCR/RT-qPCR assay using reference viral and bacterial DNA and RNA.** Each column corresponds to one specific qPCR/RT-qPCR assay and each row corresponds to one specific reference strain of virus or bacteria. Specificity was assessed for each assay in singleplex and in multiplex formats. White cases correspond to the absence of detection while black cases correspond to DNA/RNA amplification in both singleplex and multiplex assays.

(TIF)

**S2 Fig. Amplification curves generated under singleplex and multiplex conditions for a ten-fold serial dilution series of each target included in the FRA\_1 assay.** Each dilution was performed using three replicates ranging from  $10^7$  to  $10^1$  *IVT* RNA copies/ $\mu$ l. The X-axis represents the cycle number and the Y-axis represents the delta Rn value.

(TIF)

**S3 Fig. Amplification curves generated under singleplex and multiplex conditions for a ten-fold serial dilution series of each target included in the FRA\_2 assay.** Each dilution was performed using three replicates ranging from  $10^7$  to  $10^1$  plasmid DNA copies/ $\mu$ l. The X-axis

represents the cycle number, and the Y-axis represents the delta Rn value.  
(TIF)

**S1 Table. Origin and type of samples collected from URTD-suspected cats during this study.** Thirty-nine nasal swabs and 24 pharyngeal swabs were collected from 39 felines from 2020 and 2022.

(DOCX)

**S1 File. Original data used to determine the analytical specificity, sensitivity, repeatability, and reproducibility of FRA\_1 and FRA\_2 assays.**

(PDF)

## Acknowledgments

The following reagents were obtained through BEI Resources, NIAID, NIH: SARS-Related Coronavirus 2, Isolate hCoV-19/USAWA1/2020, NR-52281, Centers for Disease Control and Prevention; SARS-Related Coronavirus 2, Isolate hCoV-19/USA/CA\_UCSD\_5574/2020, NR-54020, contributed by Dr. Aaron Carlin; SARS-Related Coronavirus 2, Isolate hCoV-19/USA/MDHP01542/2021 (Lineage B.1.351), in Homo sapiens Lung Adenocarcinoma (Calu-3) Cells, NR-55282 (contributed by Andrew S. Pekosz); SARS-Related Coronavirus 2, Isolate hCoV-19/USA/MDHP05285/2021 (Lineage B.1.617.2; Delta Variant), NR-55671, contributed by Andrew S. Pekosz; SARS-Related Coronavirus 2, Isolate hCoV-19/USA/MDHP20874/2021 (Lineage B.1.1.529; Omicron Variant), NR-56461, contributed by Andrew S. Pekosz; *Bordetella bronchiseptica*, Strain E014, NR-44164; *Mycoplasma canis*, Strain PG 14, NR-3865; Alphacoronavirus 1, 79–1146 [formerly Feline Infectious Peritonitis Virus (FIPV)], NR-43287.

The authors would like to kindly acknowledge Dr. Diego Diel, Department of Population Medicine and Diagnostic Sciences, Cornell University College of Veterinary Medicine, Ithaca, NY and Dr. Edward Dubovi for providing RNA derived from canine influenza A viruses.

## Author Contributions

**Conceptualization:** Laura Peak, Udeni B. R. Balasuriya.

**Data curation:** Côme J. Thieulent.

**Formal analysis:** Côme J. Thieulent.

**Funding acquisition:** Mariano Carossino, Laura Peak, Udeni B. R. Balasuriya.

**Investigation:** Côme J. Thieulent.

**Methodology:** Côme J. Thieulent, Mariano Carossino.

**Resources:** Côme J. Thieulent.

**Software:** Côme J. Thieulent.

**Supervision:** Mariano Carossino, Udeni B. R. Balasuriya.

**Validation:** Mariano Carossino, Udeni B. R. Balasuriya.

**Visualization:** Côme J. Thieulent.

**Writing – original draft:** Côme J. Thieulent.

**Writing – review & editing:** Côme J. Thieulent, Mariano Carossino, Laura Peak, Wendy Wolfson, Udeni B. R. Balasuriya.

## References

1. Dinnage JD, Scarlett JM, Richards JR. Descriptive epidemiology of feline upper respiratory tract disease in an animal shelter. *J Feline Med Surg*. 2009; 11: 816–825. <https://doi.org/10.1016/j.jfms.2009.03.001> PMID: 19782625
2. Sykes JE. Pediatric feline upper respiratory disease. *Vet Clin North Am Small Anim Pract*. 2014; 44: 331–342. <https://doi.org/10.1016/j.cvsm.2013.10.005> PMID: 24580994
3. Cohn LA. Feline Respiratory Disease Complex. *Veterinary Clinics of North America: Small Animal Practice*. 2011; 41: 1273–1289. <https://doi.org/10.1016/j.cvsm.2011.07.006> PMID: 22041216
4. Helps CR, Lait P, Gruffydd-Jones T. tract disease caused by feline herpesvirus,. *The Veterinary Record*. 2005; 5.
5. Hofmann-Lehmann R, Hosie MJ, Hartmann K, Egberink H, Truyen U, Tasker S, et al. Calicivirus Infection in Cats. *Viruses*. 2022; 14: 937. <https://doi.org/10.3390/v14050937> PMID: 35632680
6. Walter J, Foley P, Yason C, Vanderstichel R, Muckle A. Prevalence of feline herpesvirus-1, feline calicivirus, Chlamydia felis, and Bordetella bronchiseptica in a population of shelter cats on Prince Edward Island. *Can J Vet Res*. 2020; 84: 181–188. PMID: 32801452
7. Sykes JE, Anderson GA, Studdert VP, Browning GF. Prevalence of feline Chlamydia psittaci and feline herpesvirus 1 in cats with upper respiratory tract disease. *J Vet Intern Med*. 1999; 13: 153–162. [https://doi.org/10.1892/0891-6640\(1999\)013<0153:pofpaf>2.3.co;2](https://doi.org/10.1892/0891-6640(1999)013<0153:pofpaf>2.3.co;2) PMID: 10357102
8. Bannasch MJ, Foley JE. Epidemiologic evaluation of multiple respiratory pathogens in cats in animal shelters. *Journal of Feline Medicine and Surgery*. 2005; 7: 109–119. <https://doi.org/10.1016/j.jfms.2004.07.004> PMID: 15771947
9. Johnson LR, Foley JE, De Cock HEV, Clarke HE, Maggs DJ. Assessment of infectious organisms associated with chronic rhinosinusitis in cats. *J Am Vet Med Assoc*. 2005; 227: 579–585. <https://doi.org/10.2460/javma.2005.227.579> PMID: 16117066
10. Hoskins JD, Williams J, Roy AF, Peters JC, McDonough P. Isolation and characterization of Bordetella bronchiseptica from cats in southern Louisiana. *Veterinary Immunology and Immunopathology*. 1998; 65: 173–176. [https://doi.org/10.1016/s0165-2427\(98\)00152-4](https://doi.org/10.1016/s0165-2427(98)00152-4) PMID: 9839872
11. Di Martino B, Di Francesco CE, Meridiani I, Marsilio F. Etiological investigation of multiple respiratory infections in cats. *New Microbiol*. 2007; 30: 455–461. PMID: 18080682
12. Litster A, Wu CC, Leutenegger CM. Detection of feline upper respiratory tract disease pathogens using a commercially available real-time PCR test. *Vet J*. 2015; 206: 149–153. <https://doi.org/10.1016/j.tvjl.2015.08.001> PMID: 26324635
13. Nguyen D, Barrs VR, Kelman M, Ward MP. Feline upper respiratory tract infection and disease in Australia. *J Feline Med Surg*. 2019; 21: 973–978. <https://doi.org/10.1177/1098612X18813248> PMID: 30465616
14. Palombieri A, Di Profio F, Fruci P, Sarchese V, Martella V, Marsilio F, et al. Emerging Respiratory Viruses of Cats. *Viruses*. 2022; 14: 663. <https://doi.org/10.3390/v14040663> PMID: 35458393
15. Wasik BR, Voorhees IEH, Parrish CR. Canine and Feline Influenza. *Cold Spring Harb Perspect Med*. 2021; 11: a038562. <https://doi.org/10.1101/cshperspect.a038562> PMID: 31871238
16. Frymus T, Belák S, Egberink H, Hofmann-Lehmann R, Marsilio F, Addie DD, et al. Influenza Virus Infections in Cats. *Viruses*. 2021; 13: 1435. <https://doi.org/10.3390/v13081435> PMID: 34452300
17. Leschnik M, Weikel J, Möstl K, Revilla-Fernández S, Wodak E, Bagó Z, et al. Subclinical Infection with Avian Influenza A H5N1 Virus in Cats. *Emerg Infect Dis*. 2007; 13: 243–247. <https://doi.org/10.3201/eid1302.060608> PMID: 17479886
18. Rimmelzwaan GF, van Riel D, Baars M, Bestebroer TM, van Amerongen G, Fouchier RAM, et al. Influenza A Virus (H5N1) Infection in Cats Causes Systemic Disease with Potential Novel Routes of Virus Spread within and between Hosts. *Am J Pathol*. 2006; 168: 176–183. <https://doi.org/10.2353/ajpath.2006.050466> PMID: 16400021
19. Thiry E, Zicola A, Addie D, Egberink H, Hartmann K, Lutz H, et al. Highly pathogenic avian influenza H5N1 virus in cats and other carnivores. *Vet Microbiol*. 2007; 122: 25–31. <https://doi.org/10.1016/j.vetmic.2006.12.021> PMID: 17250978
20. Kuiken T, Rimmelzwaan G, van Riel D, van Amerongen G, Baars M, Fouchier R, et al. Avian H5N1 influenza in cats. *Science*. 2004; 306: 241. <https://doi.org/10.1126/science.1102287> PMID: 15345779
21. Keawcharoen J, Oraveerakul K, Kuiken T, Fouchier RAM, Amonsin A, Payungporn S, et al. Avian Influenza H5N1 in Tigers and Leopards. *Emerg Infect Dis*. 2004; 10: 2189–2191. <https://doi.org/10.3201/eid1012.040759> PMID: 15663858
22. Marschall J, Hartmann K. Avian influenza A H5N1 infections in cats. *J Feline Med Surg*. 2008; 10: 359–365. <https://doi.org/10.1016/j.jfms.2008.03.005> PMID: 18619884



23. Fiorentini L, Taddei R, Moreno A, Gelmetti D, Barbieri I, De Marco MA, et al. Influenza A pandemic (H1N1) 2009 virus outbreak in a cat colony in Italy. *Zoonoses Public Health*. 2011; 58: 573–581. <https://doi.org/10.1111/j.1863-2378.2011.01406.x> PMID: 21824359
24. Knight CG, Davies JL, Joseph T, Ondrich S, Rosa BV. Pandemic H1N1 influenza virus infection in a Canadian cat. *Can Vet J*. 2016; 57: 497–500. PMID: 27152036
25. Sponseller BA, Strait E, Jergens A, Trujillo J, Harmon K, Koster L, et al. Influenza A pandemic (H1N1) 2009 virus infection in domestic cat. *Emerg Infect Dis*. 2010; 16: 534–537. <https://doi.org/10.3201/eid1603.091737> PMID: 20202440
26. Campagnolo ER, Rankin JT, Daverio SA, Hunt EA, Lute JR, Tewari D, et al. Fatal pandemic (H1N1) 2009 influenza A virus infection in a Pennsylvania domestic cat. *Zoonoses Public Health*. 2011; 58: 500–507. <https://doi.org/10.1111/j.1863-2378.2011.01390.x> PMID: 21824345
27. Tangwangvivat R, Chanvatik S, Charoenkul K, Chaiyawong S, Janethanakit T, Tuanudom R, et al. Evidence of pandemic H1N1 influenza exposure in dogs and cats, Thailand: A serological survey. *Zoonoses Public Health*. 2019; 66: 349–353. <https://doi.org/10.1111/zph.12551> PMID: 30552750
28. Yu Z, Gao X, Wang T, Li Y, Li Y, Xu Y, et al. Fatal H5N6 Avian Influenza Virus Infection in a Domestic Cat and Wild Birds in China. *Sci Rep*. 2015; 5: 10704. <https://doi.org/10.1038/srep10704> PMID: 26034886
29. Cao X, Yang F, Wu H, Xu L. Genetic characterization of novel reassortant H5N6-subtype influenza viruses isolated from cats in eastern China. *Arch Virol*. 2017; 162: 3501–3505. <https://doi.org/10.1007/s00705-017-3490-2> PMID: 28730524
30. Lee K, Lee E-K, Lee H, Heo G-B, Lee Y-N, Jung J-Y, et al. Highly Pathogenic Avian Influenza A(H5N6) in Domestic Cats, South Korea. *Emerg Infect Dis*. 2018; 24: 2343–2347. <https://doi.org/10.3201/eid2412.180290> PMID: 30457524
31. Blachere FM, Lindsley WG, Weber AM, Beezhold DH, Thewlis RE, Mead KR, et al. Detection of an avian lineage influenza A(H7N2) virus in air and surface samples at a New York City feline quarantine facility. *Influenza Other Respir Viruses*. 2018; 12: 613–622. <https://doi.org/10.1111/irv.12572> PMID: 29768714
32. Newbury SP, Cigel F, Killian ML, Leutenegger CM, Seguin MA, Crossley B, et al. First Detection of Avian Lineage H7N2 in *Felis catus*. *Genome Announc*. 2017; 5: e00457–17. <https://doi.org/10.1128/genomeA.00457-17> PMID: 28596397
33. Song DS, An DJ, Moon HJ, Yeom MJ, Jeong HY, Jeong WS, et al. Interspecies transmission of the canine influenza H3N2 virus to domestic cats in South Korea, 2010. *J Gen Virol*. 2011; 92: 2350–2355. <https://doi.org/10.1099/vir.0.033522-0> PMID: 21715595
34. Jeoung H-Y, Lim S-I, Shin B-H, Lim J-A, Song J-Y, Song D-S, et al. A novel canine influenza H3N2 virus isolated from cats in an animal shelter. *Vet Microbiol*. 2013; 165: 281–286. <https://doi.org/10.1016/j.vetmic.2013.03.021> PMID: 23618838
35. Ali A, Daniels JB, Zhang Y, Rodríguez-Palacios A, Hayes-Ozello K, Mathes L, et al. Pandemic and seasonal human influenza virus infections in domestic cats: prevalence, association with respiratory disease, and seasonality patterns. *J Clin Microbiol*. 2011; 49: 4101–4105. <https://doi.org/10.1128/JCM.05415-11> PMID: 21956989
36. Pigott AM, Haak CE, Breshears MA, Linklater AKJ. Acute bronchointerstitial pneumonia in two indoor cats exposed to the H1N1 influenza virus. *J Vet Emerg Crit Care (San Antonio)*. 2014; 24: 715–723. <https://doi.org/10.1111/vec.12179> PMID: 24712839
37. Cui S, Liu Y, Zhao J, Peng X, Lu G, Shi W, et al. An Updated Review on SARS-CoV-2 Infection in Animals. *Viruses*. 2022; 14: 1527. <https://doi.org/10.3390/v14071527> PMID: 35891507
38. Mahdy MAA, Younis W, Ewaida Z. An Overview of SARS-CoV-2 and Animal Infection. *Front Vet Sci*. 2020; 7: 596391. <https://doi.org/10.3389/fvets.2020.596391> PMID: 33363234
39. Shi J, Wen Z, Zhong G, Yang H, Wang C, Huang B, et al. Susceptibility of ferrets, cats, dogs, and other domesticated animals to SARS-coronavirus 2. *Science*. 2020; 368: 1016–1020. <https://doi.org/10.1126/science.abb7015> PMID: 32269068
40. Barrs VR, Peiris M, Tam KWS, Law PYT, Brackman CJ, To EMW, et al. SARS-CoV-2 in Quarantined Domestic Cats from COVID-19 Households or Close Contacts, Hong Kong, China. *Emerg Infect Dis*. 2020; 26: 3071–3074. <https://doi.org/10.3201/eid2612.202786> PMID: 32938527
41. Gaudreault NN, Trujillo JD, Carossino M, Meekins DA, Morozov I, Madden DW, et al. SARS-CoV-2 infection, disease and transmission in domestic cats. *Emerg Microbes Infect*. 2020; 9: 2322–2332. <https://doi.org/10.1080/22221751.2020.1833687> PMID: 33028154
42. Musso N, Costantino A, La Spina S, Finocchiaro A, Andronico F, Stracquadanio S, et al. New SARS-CoV-2 Infection Detected in an Italian Pet Cat by RT-qPCR from Deep Pharyngeal Swab. *Pathogens*. 2020; 9: 746. <https://doi.org/10.3390/pathogens9090746> PMID: 32932800

43. Hosie MJ, Epifano I, Herder V, Orton RJ, Stevenson A, Johnson N, et al. Detection of SARS-CoV-2 in respiratory samples from cats in the UK associated with human-to-cat transmission. *Vet Rec.* 2021; 188: e247. <https://doi.org/10.1002/vetr.247> PMID: 33890314
44. Keller M, Hagag IT, Balzer J, Beyer K, Kersebohm JC, Sadeghi B, et al. Detection of SARS-CoV-2 variant B.1.1.7 in a cat in Germany. *Res Vet Sci.* 2021; 140: 229–232. <https://doi.org/10.1016/j.rvsc.2021.09.008> PMID: 34534904
45. Klaus J, Zini E, Hartmann K, Egberink H, Kipar A, Bergmann M, et al. SARS-CoV-2 Infection in Dogs and Cats from Southern Germany and Northern Italy during the First Wave of the COVID-19 Pandemic. *Viruses.* 2021; 13: 1453. <https://doi.org/10.3390/v13081453> PMID: 34452319
46. Neira V, Brito B, Agüero B, Berrios F, Valdés V, Gutierrez A, et al. A household case evidences shorter shedding of SARS-CoV-2 in naturally infected cats compared to their human owners. *Emerg Microbes Infect.* 2021; 10: 376–383. <https://doi.org/10.1080/22221751.2020.1863132> PMID: 33317424
47. Schulz C, Wylezich C, Wernike K, Gründl M, Dangel A, Baechlein C, et al. Prolonged SARS-CoV-2 RNA Shedding from Therapy Cat after Cluster Outbreak in Retirement Home. *Emerg Infect Dis.* 2021; 27: 1974–1976. <https://doi.org/10.3201/eid2707.204670> PMID: 34152973
48. Chaintoutis SC, Siarkou VI, Mylonakis ME, Kazakos GM, Skeva P-N, Bampali M, et al. Limited cross-species transmission and absence of mutations associated with SARS-CoV-2 adaptation in cats: A case study of infection in a small household setting. *Transbound Emerg Dis.* 2022; 69: 1606–1616. <https://doi.org/10.1111/tbed.14132> PMID: 33908152
49. Fritz M, Nesi N, Denolly S, Boson B, Legros V, Rosolen SG, et al. Detection of SARS-CoV-2 in two cats during the second wave of the COVID-19 pandemic in France. *Vet Med Sci.* 2022; 8: 14–20. <https://doi.org/10.1002/vms3.638> PMID: 34704394
50. McAloose D, Laverack M, Wang L, Killian ML, Caserta LC, Yuan F, et al. From People to Panthera: Natural SARS-CoV-2 Infection in Tigers and Lions at the Bronx Zoo. *mBio.* 2020; 11: e02220–20. <https://doi.org/10.1128/mBio.02220-20> PMID: 33051368
51. Grome HN, Meyer B, Read E, Buchanan M, Cushing A, Sawatzki K, et al. SARS-CoV-2 Outbreak among Malayan Tigers and Humans, Tennessee, USA, 2020. *Emerg Infect Dis.* 2022; 28: 833–836. <https://doi.org/10.3201/eid2804.212219> PMID: 35318922
52. Mishra A, Kumar N, Bhatia S, Aasdev A, Kannian S, Sekhar AT, et al. SARS-CoV-2 Delta Variant among Asiatic Lions, India. *Emerg Infect Dis.* 2021; 27: 2723–2725. <https://doi.org/10.3201/eid2710.211500> PMID: 34545805
53. Koepfel KN, Mendes A, Strydom A, Rotherham L, Mulumba M, Venter M. SARS-CoV-2 Reverse Zoonoses to Pumas and Lions, South Africa. *Viruses.* 2022; 14: 120. <https://doi.org/10.3390/v14010120> PMID: 35062324
54. Zoccola R, Beltramo C, Magris G, Peletto S, Acutis P, Bozzetta E, et al. First detection of an Italian human-to-cat outbreak of SARS-CoV-2 Alpha variant—lineage B.1.1.7. *One Health.* 2021; 13: 100295. <https://doi.org/10.1016/j.onehlt.2021.100295> PMID: 34316508
55. Miró G, Regidor-Cerrillo J, Checa R, Diezma-Díaz C, Montoya A, García-Cantalejo J, et al. SARS-CoV-2 Infection in One Cat and Three Dogs Living in COVID-19-Positive Households in Madrid, Spain. *Front Vet Sci.* 2021; 8: 779341. <https://doi.org/10.3389/fvets.2021.779341> PMID: 34901253
56. Carossino M, Barrandeguy ME, Erol E, Li Y, Balasuriya UBR. Development and evaluation of a one-step multiplex real-time TaqMan<sup>®</sup> RT-qPCR assay for the detection and genotyping of equine G3 and G14 rotaviruses in fecal samples. *Virology.* 2019; 16: 49. <https://doi.org/10.1186/s12985-019-1149-1> PMID: 31023319
57. Pan Z, Lu J, Wang N, He W-T, Zhang L, Zhao W, et al. Development of a TaqMan-probe-based multiplex real-time PCR for the simultaneous detection of emerging and reemerging swine coronaviruses. *Virulence.* 2020; 11: 707–718. <https://doi.org/10.1080/21505594.2020.1771980> PMID: 32490723
58. Pansri P, Katholm J, Krogh KM, Aagaard AK, Schmidt LMB, Kudirkiene E, et al. Evaluation of novel multiplex qPCR assays for diagnosis of pathogens associated with the bovine respiratory disease complex. *Vet J.* 2020; 256: 105425. <https://doi.org/10.1016/j.tvjl.2020.105425> PMID: 32113583
59. Wang R, Zhang W, Ye R, Pan Z, Li G, Su S. One-step multiplex TaqMan probe-based method for real-time PCR detection of four canine diarrhea viruses. *Molecular and Cellular Probes.* 2020; 53: 101618. <https://doi.org/10.1016/j.mcp.2020.101618> PMID: 32534013
60. Carossino M, Balasuriya UBR, Thieulent CJ, Barrandeguy ME, Vissani MA, Parreño V. Quadruplex Real-Time TaqMan<sup>®</sup> RT-qPCR Assay for Differentiation of Equine Group A and B Rotaviruses and Identification of Group A G3 and G14 Genotypes. 2023.
61. Thieulent CJ, Carossino M, Peak L, Wolfson W, Balasuriya UBR. Multiplex One-Step RT-qPCR Assays for Simultaneous Detection of SARS-CoV-2 and Other Enteric Viruses of Dogs and Cats. *Viruses.* 2023; 15: 1890. <https://doi.org/10.3390/v15091890> PMID: 37766296

62. Thieulent CJ, Carossino M, Peak L, Strother K, Wolfson W, Balasuriya UBR. Development and Validation of a Panel of One-Step Four-Plex qPCR/RT-qPCR Assays for Simultaneous Detection of SARS-CoV-2 and Other Pathogens Associated with Canine Infectious Respiratory Disease Complex. *Viruses*. 2023; 15: 1881. <https://doi.org/10.3390/v15091881> PMID: 37766287
63. Spackman E, Senne DA, Myers TJ, Bulaga LL, Garber LP, Perdue ML, et al. Development of a Real-Time Reverse Transcriptase PCR Assay for Type A Influenza Virus and the Avian H5 and H7 Hemagglutinin Subtypes. *J Clin Microbiol*. 2002; 40: 3256–3260. <https://doi.org/10.1128/JCM.40.9.3256-3260.2002> PMID: 12202562
64. Slomka MJ, Densham ALE, Coward VJ, Essen S, Brookes SM, Irvine RM, et al. Original Article: Real time reverse transcription (RRT)-polymerase chain reaction (PCR) methods for detection of pandemic (H1N1) 2009 influenza virus and European swine influenza A virus infections in pigs: SIV and pandemic (H1N1) 2009 detection by RRT PCRs. *Influenza and Other Respiratory Viruses*. 2010; 4: 277–293. <https://doi.org/10.1111/j.1750-2659.2010.00149.x> PMID: 20716157
65. Lu X, Wang L, Sakthivel SK, Whitaker B, Murray J, Kamili S, et al. US CDC Real-Time Reverse Transcription PCR Panel for Detection of Severe Acute Respiratory Syndrome Coronavirus 2. *Emerg Infect Dis*. 2020; 26: 1654–1665. <https://doi.org/10.3201/eid2608.201246> PMID: 32396505
66. Tizolova A, Brun D, Guiso N, Guillot S. Development of real-time PCR assay for differential detection of *Bordetella bronchiseptica* and *Bordetella parapertussis*. *Diagnostic Microbiology and Infectious Disease*. 2014; 78: 347–351. <https://doi.org/10.1016/j.diagmicrobio.2013.12.020> PMID: 24525142
67. Söderlund R, Bölske G, Holst BS, Aspán A. Development and evaluation of a real-time polymerase chain reaction method for the detection of *Mycoplasma felis*. *J VET Diagn Invest*. 2011; 23: 890–893. <https://doi.org/10.1177/1040638711407479> PMID: 21908343
68. Pantchev A, Sting R, Bauerfeind R, Tyczka J, Sachse K. Detection of all *Chlamydia* and *Chlamydia* spp. of veterinary interest using species-specific real-time PCR assays. *Comparative Immunology, Microbiology and Infectious Diseases*. 2010; 33: 473–484. <https://doi.org/10.1016/j.cimid.2009.08.002> PMID: 19733907
69. Carossino M, Li Y, Lee P-YA, Tsai C-F, Chou P-H, Williams D, et al. Evaluation of a field-deployable reverse transcription-insulated isothermal PCR for rapid and sensitive on-site detection of Zika virus. *BMC Infect Dis*. 2017; 17: 778. <https://doi.org/10.1186/s12879-017-2852-4> PMID: 29258444
70. Carossino M, Lee P-YA, Nam B, Skillman A, Shuck KM, Timoney PJ, et al. Development and evaluation of a reverse transcription-insulated isothermal polymerase chain reaction (RT-iiPCR) assay for detection of equine arteritis virus in equine semen and tissue samples using the POKKIT™ system. *J Virol Methods*. 2016; 234: 7–15. <https://doi.org/10.1016/j.jviromet.2016.02.015> PMID: 27036504
71. Lu Z, Chambers TM, Boliar S, Branscum AJ, Sturgill TL, Timoney PJ, et al. Development and Evaluation of One-Step TaqMan Real-Time Reverse Transcription-PCR Assays Targeting Nucleoprotein, Matrix, and Hemagglutinin Genes of Equine Influenza Virus. *J Clin Microbiol*. 2009; 47: 3907–3913. <https://doi.org/10.1128/JCM.00598-09> PMID: 19846644
72. Lu Z, Branscum AJ, Shuck KM, Zhang J, Dubovi EJ, Timoney PJ, et al. Comparison of two real-time reverse transcription polymerase chain reaction assays for the detection of *Equine arteritis virus* nucleic acid in equine semen and tissue culture fluid. *J VET Diagn Invest*. 2008; 20: 147–155. <https://doi.org/10.1177/104063870802000202> PMID: 18319426
73. Burd EM. Validation of laboratory-developed molecular assays for infectious diseases. *Clin Microbiol Rev*. 2010; 23: 550–576. <https://doi.org/10.1128/CMR.00074-09> PMID: 20610823
74. McManus CM, Levy JK, Andersen LA, McGorray SP, Leutenegger CM, Gray LK, et al. Prevalence of upper respiratory pathogens in four management models for unowned cats in the Southeast United States. *The Veterinary Journal*. 2014; 201: 196–201. <https://doi.org/10.1016/j.tvjl.2014.05.015> PMID: 24923756
75. Schulz C, Hartmann K, Mueller RS, Helps C, Schulz BS. Sampling sites for detection of feline herpesvirus-1, feline calicivirus and *Chlamydia felis* in cats with feline upper respiratory tract disease. *J Feline Med Surg*. 2015; 17: 1012–1019. <https://doi.org/10.1177/1098612X15569615> PMID: 25660223
76. Mao J, Ye S, Li Q, Bai Y, Wu J, Xu L, et al. Molecular Characterization and Phylogenetic Analysis of Feline Calicivirus Isolated in Guangdong Province, China from 2018 to 2022. *Viruses*. 2022; 14: 2421. <https://doi.org/10.3390/v14112421> PMID: 36366519
77. Xiao X, Hao X, Chen B, Zhou P, Li S. Two Multiplex PCR Methods for Detecting Several Pathogens Associated with Feline Respiratory and Intestinal Tracts. *Veterinary Sciences*. 2023; 10: 14. <https://doi.org/10.3390/vetsci10010014> PMID: 36669015
78. Gaby JC, Buckley DH. The Use of Degenerate Primers in qPCR Analysis of Functional Genes Can Cause Dramatic Quantification Bias as Revealed by Investigation of nifH Primer Performance. *Microb Ecol*. 2017; 74: 701–708. <https://doi.org/10.1007/s00248-017-0968-0> PMID: 28389727

79. Nam YR, Lee U, Choi HS, Lee KJ, Kim N, Jang YJ, et al. Degenerate PCR primer design for the specific identification of rhinovirus C. *Journal of Virological Methods*. 2015; 214: 15–24. <https://doi.org/10.1016/j.jviromet.2014.10.021> PMID: 25483126
80. Rijsewijk F, Pritz-Verschuren S, Kerkhoff S, Botter A, Willemsen M, Nieuwstadt TV, et al. Development of a polymerase chain reaction for the detection of Anguillid herpesvirus DNA in eels based on the herpesvirus DNA polymerase gene. *Journal of Virological Methods*. 2005; 124: 87–94. <https://doi.org/10.1016/j.jviromet.2004.11.007> PMID: 15664055
81. Fernandez M, Manzanilla EG, Lloret A, León M, Thibault J-C. Prevalence of feline herpesvirus-1, feline calicivirus, *Chlamydomydia felis* and *Mycoplasma felis* DNA and associated risk factors in cats in Spain with upper respiratory tract disease, conjunctivitis and/or gingivostomatitis. *J Feline Med Surg*. 2017; 19: 461–469. <https://doi.org/10.1177/1098612X16634387> PMID: 26919892
82. Vekšins A. Feline upper respiratory tract disease—Computed tomography and laboratory diagnostic. *Vet World*. 2022; 15: 1880–1886. <https://doi.org/10.14202/vetworld.2022.1880-1886> PMID: 36185517
83. Le Boedec K. A systematic review and meta-analysis of the association between *Mycoplasma* spp and upper and lower respiratory tract disease in cats. *J Am Vet Med Assoc*. 2017; 250: 397–407. <https://doi.org/10.2460/javma.250.4.397> PMID: 28165317
