# Supplementary material for: Development and validation of multiplex one-step qPCR/RT-qPCR assays for simultaneous detection of SARS-CoV-2 and pathogens associated with feline respiratory disease complex
Source: PubMed Central journal article supplement (PMC10959388; doi:10.1371/journal.pone.0297796), 2024-03-22
Supplement: pone.0297796.s005.pdf [file pone.0297796.s005.pdf]

**FRA 2 assay**

| Dye                      | Standard curves          |         |         |  |  |                 |         |         |  |  | Single-plex     |         |         |  |  |                          |         |         |  |  |                 |         |         |  |  |                 |       |       |  |  |
|--------------------------|--------------------------|---------|---------|--|--|-----------------|---------|---------|--|--|-----------------|---------|---------|--|--|--------------------------|---------|---------|--|--|-----------------|---------|---------|--|--|-----------------|-------|-------|--|--|
|                          | Multiplex                |         |         |  |  | ABY             |         |         |  |  | VIC             |         |         |  |  | FAM                      |         |         |  |  | ABY             |         |         |  |  | VIC             |       |       |  |  |
|                          | <i>B. bronchiseptica</i> |         |         |  |  | <i>C. felis</i> |         |         |  |  | <i>M. felis</i> |         |         |  |  | <i>B. bronchiseptica</i> |         |         |  |  | <i>C. felis</i> |         |         |  |  | <i>M. felis</i> |       |       |  |  |
| Target (copies/ $\mu$ l) | 33.5577                  | 34.0506 | 33.7113 |  |  | 33.7928         | 33.6334 | 33.6483 |  |  | 33.0819         | 32.6959 | 32.2194 |  |  | 33.7561                  | 33.8686 | 34.3714 |  |  | 32.3522         | 32.4897 | 33.1156 |  |  | 32.85           | 32.99 | 33.43 |  |  |
| 1.00E+02                 | 30.7328                  | 30.6835 | 30.5749 |  |  | 29.9029         | 30.4174 | 30.1991 |  |  | 29.771          | 29.7001 | 29.9736 |  |  | 31.0498                  | 31.0324 | 31.1507 |  |  | 30.087          | 30.059  | 30.047  |  |  | 30.36           | 30.35 | 30.46 |  |  |
| 1.00E+04                 | 27.6941                  | 27.689  | 27.5289 |  |  | 26.92           | 27.0355 | 27.0385 |  |  | 26.8033         | 26.7661 | 26.932  |  |  | 27.8491                  | 27.7302 | 27.7464 |  |  | 26.672          | 26.4225 | 26.7141 |  |  | 27.14           | 26.94 | 27.1  |  |  |
| 1.00E+05                 | 24.4306                  | 24.3833 | 24.327  |  |  | 24.2148         | 23.981  | 23.883  |  |  | 23.4505         | 23.5128 | 23.4545 |  |  | 24.762                   | 24.6219 | 24.6045 |  |  | 23.5755         | 23.075  | 23.3601 |  |  | 24.03           | 23.78 | 23.9  |  |  |
| 1.00E+06                 | 21.1536                  | 21.1684 | 21.1341 |  |  | 21.1821         | 20.6355 | 20.7838 |  |  | 20.2486         | 20.3229 | 20.1449 |  |  | 21.5439                  | 21.4355 | 21.3727 |  |  | 20.3064         | 20.297  | 20.1868 |  |  | 20.82           | 20.65 | 20.59 |  |  |
| 1.00E+07                 | 17.515                   | 18.0547 | 18.0329 |  |  | 17.9898         | 18.0549 | 17.7396 |  |  | 17.1012         | 17.1033 | 17.059  |  |  | 18.2983                  | 18.2826 | 18.2682 |  |  | 17.1757         | 17.0932 | 17.1736 |  |  | 17.51           | 17.46 | 17.49 |  |  |

| replicat # | LOD95% Detection rate limit & Ct cut-off |         |         |         |          |          |         |         |         |         |                 |          |         |         |         |         |          |          |          |         | Single-plex     |          |          |          |         |         |          |          |          |         |                          |          |          |          |  |  |  |  |  |  |                 |  |  |  |  |  |  |  |  |  |                 |  |  |  |  |  |  |  |  |  |
|------------|------------------------------------------|---------|---------|---------|----------|----------|---------|---------|---------|---------|-----------------|----------|---------|---------|---------|---------|----------|----------|----------|---------|-----------------|----------|----------|----------|---------|---------|----------|----------|----------|---------|--------------------------|----------|----------|----------|--|--|--|--|--|--|-----------------|--|--|--|--|--|--|--|--|--|-----------------|--|--|--|--|--|--|--|--|--|
|            | Multiplex                                |         |         |         |          |          |         |         |         |         | ABY             |          |         |         |         |         |          |          |          |         | VIC             |          |          |          |         |         |          |          |          |         | FAM                      |          |          |          |  |  |  |  |  |  | ABY             |  |  |  |  |  |  |  |  |  | VIC             |  |  |  |  |  |  |  |  |  |
|            | <i>B. bronchiseptica</i>                 |         |         |         |          |          |         |         |         |         | <i>C. felis</i> |          |         |         |         |         |          |          |          |         | <i>M. felis</i> |          |          |          |         |         |          |          |          |         | <i>B. bronchiseptica</i> |          |          |          |  |  |  |  |  |  | <i>C. felis</i> |  |  |  |  |  |  |  |  |  | <i>M. felis</i> |  |  |  |  |  |  |  |  |  |
| 1          | 24.8895                                  | 27.9261 | 31.5557 | 37.6133 | Undeterm | Undeterm | 24.291  | 27.2508 | 31.2009 | 35.5471 | 38.8676         | Undeterm | 23.9994 | 26.949  | 30.808  | 35.0648 | Undeterm | Undeterm | 28.5081  | 31.8663 | 37.8994         | 39.299   | Undeterm | 28.6059  | 32.3042 | 37.405  | Undeterm | Undeterm | 28.7611  | 32.1436 | 34.9064                  | 38.5339  | Undeterm | Undeterm |  |  |  |  |  |  |                 |  |  |  |  |  |  |  |  |  |                 |  |  |  |  |  |  |  |  |  |
| 2          | 24.8841                                  | 27.501  | 31.217  | 35.105  | Undeterm | Undeterm | 24.2426 | 26.6939 | 30.6532 | 33.5705 | 37.26           | Undeterm | 24.0545 | 26.4283 | 30.2957 | 33.5539 | 38.1363  | Undeterm | Undeterm | 28.372  | 31.6505         | 35.9713  | Undeterm | Undeterm | 28.7554 | 33.7011 | 35.3529  | Undeterm | Undeterm | 28.8949 | 33.4344                  | 37.2247  | Undeterm | Undeterm |  |  |  |  |  |  |                 |  |  |  |  |  |  |  |  |  |                 |  |  |  |  |  |  |  |  |  |
| 3          | 24.4968                                  | 27.9611 | 31.8141 | 34.1051 | Undeterm | Undeterm | 23.8372 | 27.3168 | 30.9315 | 33.535  | Undeterm        | Undeterm | 23.68   | 26.9395 | 30.6998 | 33.159  | Undeterm | Undeterm | 28.3144  | 33.0836 | 37.4347         | Undeterm | Undeterm | 28.6825  | 31.1675 | 34.9914 | Undeterm | Undeterm | 29.0663  | 32.9811 | 36.076                   | Undeterm | Undeterm |          |  |  |  |  |  |  |                 |  |  |  |  |  |  |  |  |  |                 |  |  |  |  |  |  |  |  |  |
| 4          | 24.5403                                  | 27.6041 | 31.5793 | 36.8406 | Undeterm | Undeterm | 24.0518 | 26.8156 | 30.8582 | 35.2326 | Undeterm        | Undeterm | 23.7403 | 26.6559 | 30.7633 | 35.4194 | Undeterm | Undeterm | 28.1414  | 32.7673 | 35.494          | Undeterm | Undeterm | 28.1071  | 32.0886 | 33.2204 | Undeterm | Undeterm | 29.1744  | 32.9879 | 34.0923                  | Undeterm | Undeterm |          |  |  |  |  |  |  |                 |  |  |  |  |  |  |  |  |  |                 |  |  |  |  |  |  |  |  |  |
| 5          | 24.6828                                  | 27.8625 | 31.8229 | 34.7107 | Undeterm | Undeterm | 24.2183 | 26.9405 | 31.2975 | 33.8984 | Undeterm        | Undeterm | 24.0285 | 26.7912 | 30.9799 | 33.6374 | Undeterm | Undeterm | 28.1012  | 32.6678 | 35.0193         | Undeterm | Undeterm | 28.3587  | 32.278  | 35.4141 | Undeterm | Undeterm | 29.1048  | 33.3894 | 34.9079                  | Undeterm | Undeterm |          |  |  |  |  |  |  |                 |  |  |  |  |  |  |  |  |  |                 |  |  |  |  |  |  |  |  |  |
| 6          | 24.7471                                  | 27.2995 | 31.7807 | 33.6709 | Undeterm | Undeterm | 24.1134 | 26.4686 | 31.1803 | 32.9735 | 33.2296         | Undeterm | 23.9947 | 26.2799 | 30.8545 | 32.7608 | 33.0268  | Undeterm | Undeterm | 28.3638 | 32.4033         | 36.9997  | Undeterm | Undeterm | 28.4061 | 32.2939 | 36.1778  | 36.7042  | Undeterm | 29.0392 | 32.0658                  | 36.0197  | Undeterm | Undeterm |  |  |  |  |  |  |                 |  |  |  |  |  |  |  |  |  |                 |  |  |  |  |  |  |  |  |  |
| 7          | 24.6415                                  | 27.6527 | 31.4427 | 34.1107 | Undeterm | Undeterm | 24.0012 | 26.8972 | 30.5161 | 33.3171 | Undeterm        | Undeterm | 23.9029 | 26.6674 | 30.4539 | 33.2386 | 39.2714  | Undeterm | Undeterm | 28.2964 | 32.5496         | 34.8302  | Undeterm | Undeterm | 27.8638 | 32.0047 | 36.7217  | Undeterm | Undeterm | 29.3501 | 32.3181                  | 35.2355  | Undeterm | Undeterm |  |  |  |  |  |  |                 |  |  |  |  |  |  |  |  |  |                 |  |  |  |  |  |  |  |  |  |
| 8          | 24.5124                                  | 27.3591 | 31.3091 | 34.3876 | Undeterm | Undeterm | 23.9238 | 26.4014 | 30.8524 | 33.6176 | 39.3626         | Undeterm | 23.7667 | 26.2828 | 30.6257 | 33.3731 | Undeterm | Undeterm | 28.1589  | 31.8871 | 35.5259         | Undeterm | Undeterm | 28.2699  | 32.7606 | 34.481  | Undeterm | Undeterm | 28.9977  | 31.9468 | 36.5522                  | Undeterm | Undeterm |          |  |  |  |  |  |  |                 |  |  |  |  |  |  |  |  |  |                 |  |  |  |  |  |  |  |  |  |
| 9          | 24.649                                   | 27.6502 | 31.6078 | 34.61   | Undeterm | Undeterm | 23.7981 | 27.0518 | 31.0148 | 33.6954 | 37.3851         | Undeterm | 23.7646 | 26.6911 | 30.8002 | 33.3325 | 36.7002  | Undeterm | Undeterm | 28.5147 | 32.32           | 35.5     | 36.3093  | Undeterm | 28.4584 | 31.0269 | 36.4804  | Undeterm | Undeterm | 28.9075 | 33.0798                  | 38.5525  | Undeterm | Undeterm |  |  |  |  |  |  |                 |  |  |  |  |  |  |  |  |  |                 |  |  |  |  |  |  |  |  |  |
| 10         | 24.7058                                  | 27.8764 | 31.3665 | 34.246  | 37.8834  | Undeterm | 24.0396 | 27.0564 | 30.6219 | 31.1914 | 35.7798         | Undeterm | 23.9151 | 26.7888 | 30.4373 | 33.1872 | 35.4628  | Undeterm | Undeterm | 28.238  | 31.3455         | 36.4778  | 39.7575  | Undeterm | 28.4213 | 32.2679 | 34.7771  | Undeterm | Undeterm | 28.8619 | 32.4355                  | 35.8298  | Undeterm | Undeterm |  |  |  |  |  |  |                 |  |  |  |  |  |  |  |  |  |                 |  |  |  |  |  |  |  |  |  |
| 11         | 24.645                                   | 27.9205 | 31.0367 | 33.7931 | 35.9166  | Undeterm | 24.2002 | 27.1118 | 30.624  | 33.1333 | 35.6211         | Undeterm | 23.9258 | 26.8307 | 30.271  | 32.8248 | 34.6987  | Undeterm | Undeterm | 28.3163 | 32.5647         | 36.3225  | Undeterm | Undeterm | 28.6505 | 32.483  | 37.4123  | Undeterm | Undeterm | 29.2009 | 32.8711                  | 37.43    | Undeterm | Undeterm |  |  |  |  |  |  |                 |  |  |  |  |  |  |  |  |  |                 |  |  |  |  |  |  |  |  |  |
| 12         | 24.7762                                  | 28.0511 | 31.378  | 33.9043 | Undeterm | Undeterm | 24.0413 | 27.5353 | 30.6364 | 36.573  | Undeterm        | Undeterm | 23.9323 | 27.1376 | 30.3251 | 36.4637 | Undeterm | Undeterm | 28.4724  | 32.4218 | 36.705          | 37.2097  | Undeterm | 28.0598  | 32.3634 | 33.8054 | Undeterm | Undeterm | 29.0849  | 32.0289 | 34.026                   | Undeterm | Undeterm |          |  |  |  |  |  |  |                 |  |  |  |  |  |  |  |  |  |                 |  |  |  |  |  |  |  |  |  |
| Average    | 24.66                                    | 27.72   | 31.49   | 34.76   | 36.90    | #DIV/0!  | 24.06   | 26.96   | 30.87   | 34.02   | 36.79           | #DIV/0!  | 23.89   | 26.70   | 30.61   | 33.83   | 36.22    | #DIV/0!  | 28.32    | 32.29   | 36.18           | 38.14    | #DIV/0!  | 28.39    | 32.23   | 35.52   | 36.70    | #DIV/0!  | 29.04    | 32.64   | 35.90                    | 38.53    | #DIV/0!  |          |  |  |  |  |  |  |                 |  |  |  |  |  |  |  |  |  |                 |  |  |  |  |  |  |  |  |  |
| STDEV      | 0.11                                     | 0.25    | 0.25    | 1.23    | 1.39     | #DIV/0!  | 0.16    | 0.33    | 0.26    | 1.13    | 2.10            | #DIV/0!  | 0.12    | 0.26    | 0.24    | 1.16    | 2.29     | #DIV/0!  | 0.14     | 0.51    | 0.96            | 1.65     | #DIV/0!  | 0.27     | 0.69    | 1.35    | #DIV/0!  | 0.16     | 0.54     | 1.38    | #DIV/0!                  | #DIV/0!  |          |          |  |  |  |  |  |  |                 |  |  |  |  |  |  |  |  |  |                 |  |  |  |  |  |  |  |  |  |
| Ct cut-off | 25                                       | 28      | 32      | 38      | 41       | #DIV/0!  | 25      | 28      | 32      | 37      | 43              | #DIV/0!  | 24      | 27      | 31      | 37      | 43       | #DIV/0!  | 29       | 34      | 39              | 43       | #DIV/0!  | 29       | 34      | 40      | #DIV/0!  | #DIV/0!  | 30       | 34      | 40                       | #DIV/0!  | #DIV/0!  |          |  |  |  |  |  |  |                 |  |  |  |  |  |  |  |  |  |                 |  |  |  |  |  |  |  |  |  |
| LOD95%     | 11                                       |         |         |         |          |          | 7       |         |         |         |                 |          | 9       |         |         |         |          |          | 9        |         |                 |          |          | 15       |         |         |          |          |          |         |                          |          |          |          |  |  |  |  |  |  |                 |  |  |  |  |  |  |  |  |  |                 |  |  |  |  |  |  |  |  |  |

| Intra-run variability |        |
|-----------------------|--------|
| a                     | -3.159 |
| b                     | 37.27  |
| 1                     | 3.98   |
| 2                     | 3.92   |
| 3                     | 4.04   |
| 4                     | 4.03   |
| 5                     | 3.98   |
| 6                     | 3.96   |
| 7                     | 4.00   |
| 8                     | 4.04   |
| 9                     | 4.00   |
| 10                    | 3.98   |
| 11                    | 4.00   |
| 12                    | 3.95   |
| 13                    | 3.99   |
| AVERAGE               | 3.99   |
| STDEV                 | 0.03   |
| %CV                   | 0.85   |

| Inter-run variability |            |
|-----------------------|------------|
| replicat              | 1.00E+05   |
| 1                     | 24.76      |
| 2                     | 24.62      |
| 3                     | 24.6       |
| 1                     | 3.96       |
| 2                     | 4.00       |
| 3                     | 4.01       |
| AVERAGE               | 3.98       |
| STDEV                 | 0.02344377 |
| %CV                   | 0.59       |
